# Supplementary material for: Nickel-catalyzed syn-stereocontrolled ring-opening of oxa- and azabicyclic alkenes with dialkylzinc reagents
Source: Royal Society of Chemistry journal article supplement (doi:10.1039/c8ob02864h), 2019-01-01
Supplement: c8ob02864h1.pdf [file c8ob02864h1.pdf]

# **Nickel-Catalyzed *syn*-Stereocontrolled Ring-Opening of Oxa- and Azabicyclic Alkenes with Dialkylzinc Reagents**

Yingying Deng, Wen Yang, Yongqi Yao, Xin Yang, Xiongjun Zuo, and Dingqiao Yang\*

Key Laboratory of Theoretical Chemistry of Environment, Ministry of Education, School of  
Chemistry and Environment, South China Normal University, Guangzhou 510006, People's

Republic of China

Phone: +86 20 31040403; Fax: +86 20 31040403.

yangdq@scnu.edu.cn (D.Y.).

## **Supporting Information**

### **Table of Contents**

|                                                                                       |              |
|---------------------------------------------------------------------------------------|--------------|
| <b>1. General Information .....</b>                                                   | <b>2</b>     |
| <b>2. Copies of <sup>1</sup>H, <sup>13</sup>C and <sup>19</sup>F NMR spectra.....</b> | <b>3-25</b>  |
| <b>3. HPLC chromatograms for compounds.....</b>                                       | <b>26-31</b> |

## 1. General information

Unless otherwise indicated, all reagents were purchased from commercial suppliers and used without further purification. Toluene and pentane was distilled from sodium benzophenone ketyl and  $\text{CH}_2\text{Cl}_2$  was distilled from calcium hydride. Super dry solvent THF, DMF, 1,4-dioxane, *i*-PrOH and  $\text{CH}_3\text{CN}$  were used without any pretreatment. All flasks were flame-dried under a stream of nitrogen and cooled to room temperature before use. Flash column chromatography was performed using the indicated solvent system on Qingdao-Haiyang silica gel (200–300 mesh). Peaks recorded are relative to the internal standards: TMS ( $\delta = 0.00$ ) for  $^1\text{H}$  NMR and  $\text{CDCl}_3$  ( $\delta = 77.00$ ) for  $^{13}\text{C}$  NMR spectra.  $^1\text{H}$  and  $^{13}\text{C}$  NMR spectra were recorded at 400/500/600 MHz and 101/126/151 MHz at 25 °C in  $\text{CDCl}_3/d_6\text{-DMSO}/\text{CD}_3\text{OD}$ , respectively.  $^{19}\text{F}$  NMR spectra was recorded at 376/470/565 MHz at 25 °C in  $\text{CDCl}_3$ . Spectral data are reported as follows: chemical shift ( $\delta$ , ppm); multiplicity (s-singlet, d-doublet, t-triplet, q-quadruplet, m-multiplet); coupling constants ( $J$ , Hz) and number of protons. HRMS (ion trap) were obtained from mass spectrometer (ESI) and MS were recorded using EI at 70 eV. Melting points were uncorrected.

## 2. Copies of $^1\text{H}$ , $^{13}\text{C}$ and $^{19}\text{F}$ NMR spectra

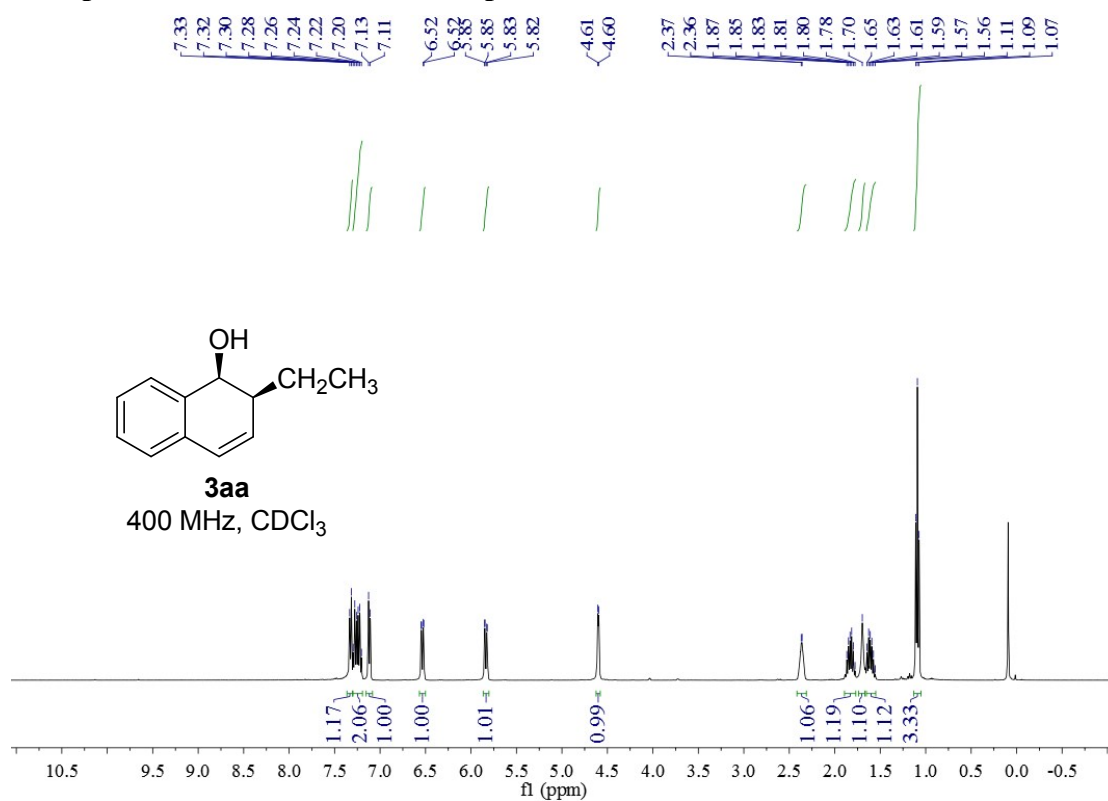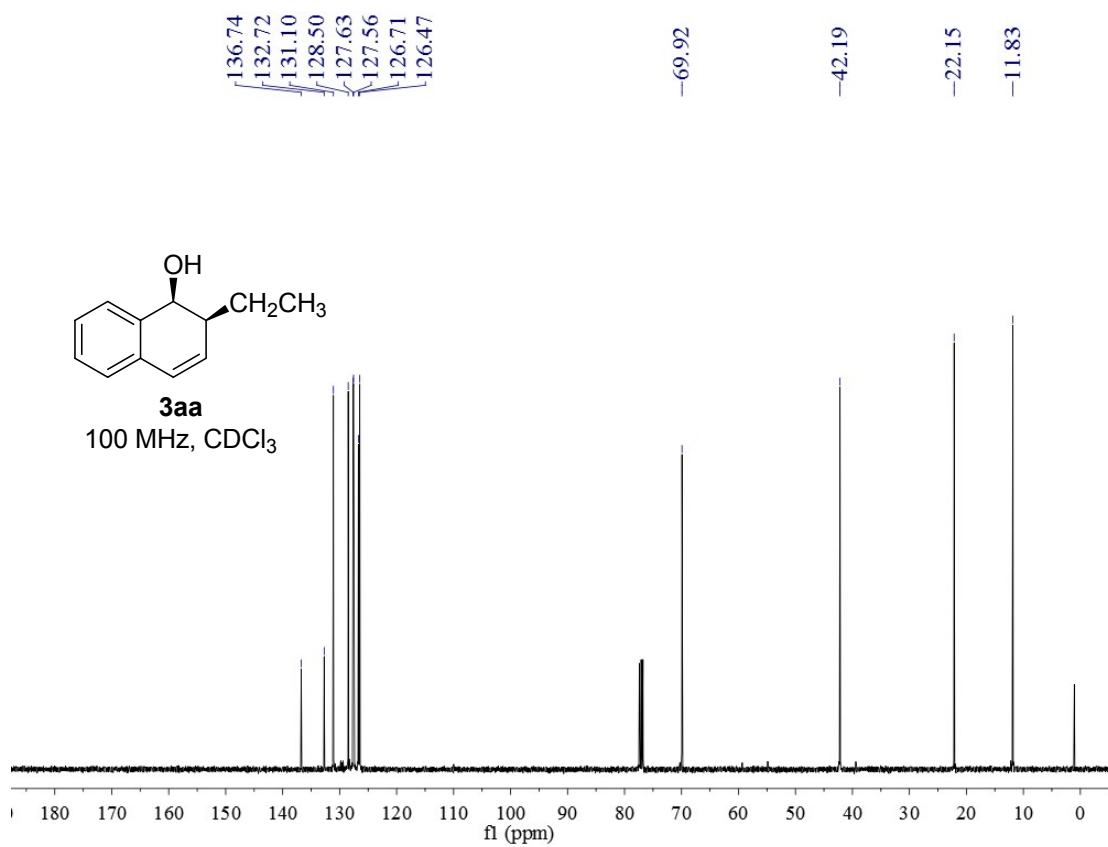

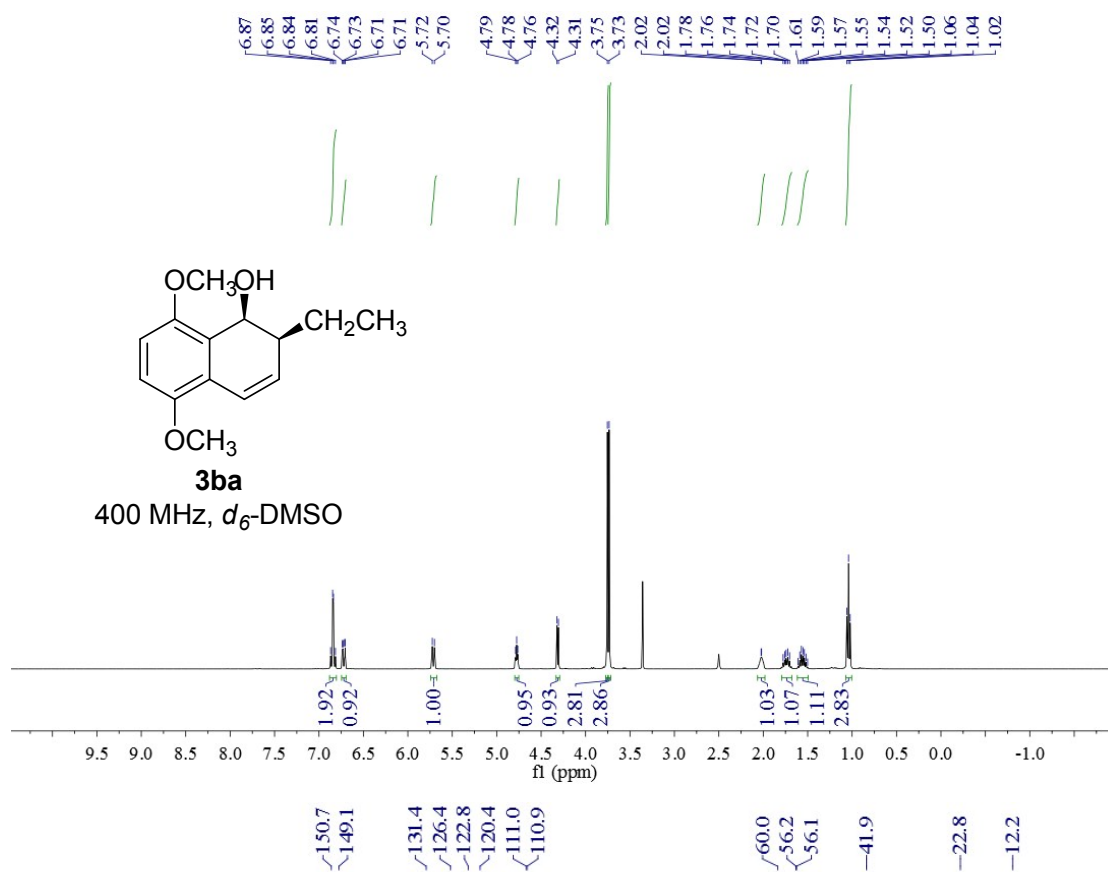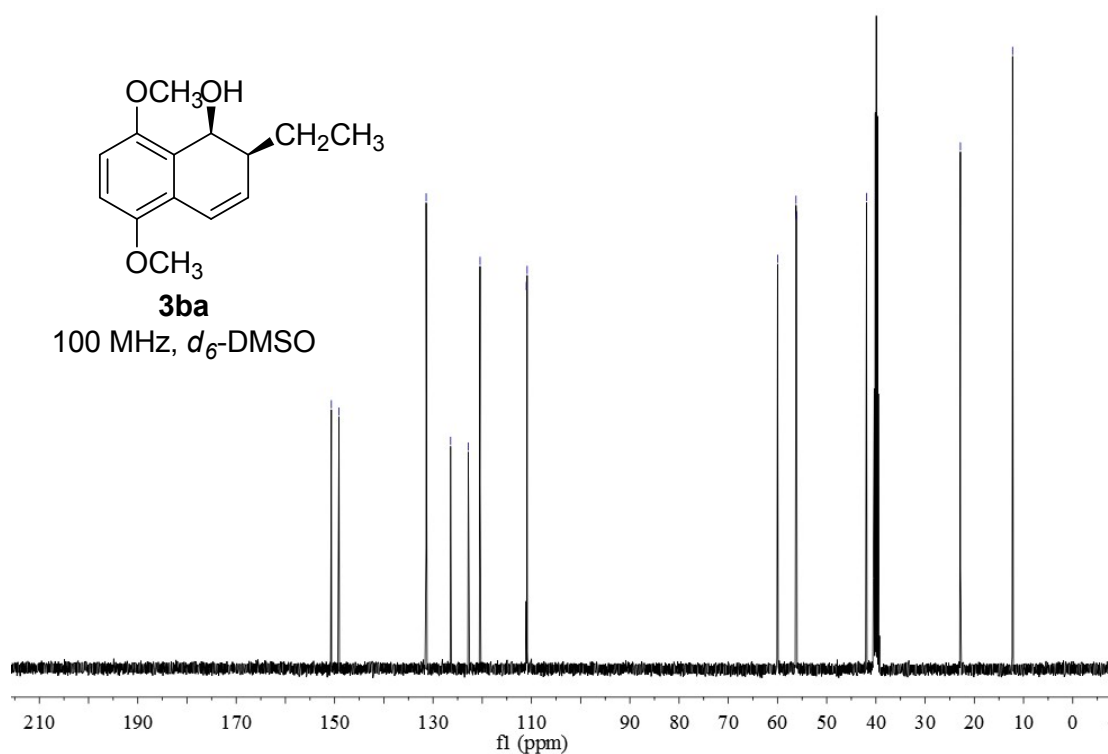

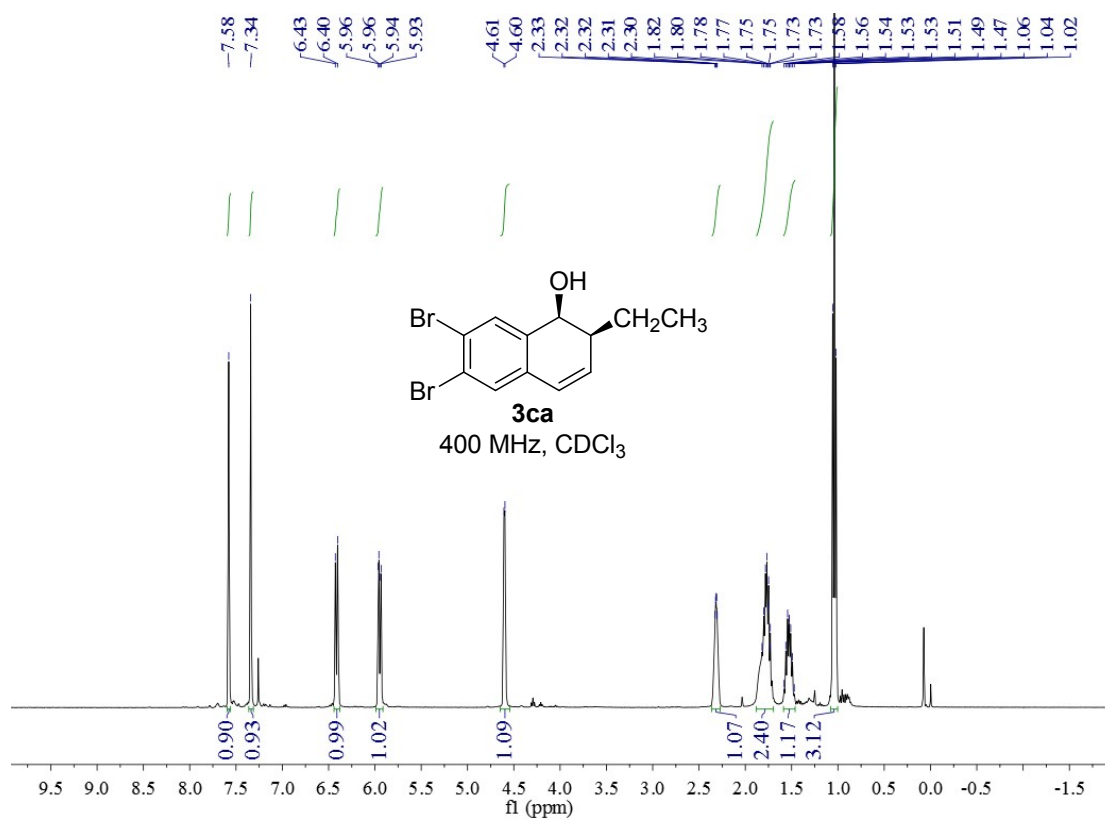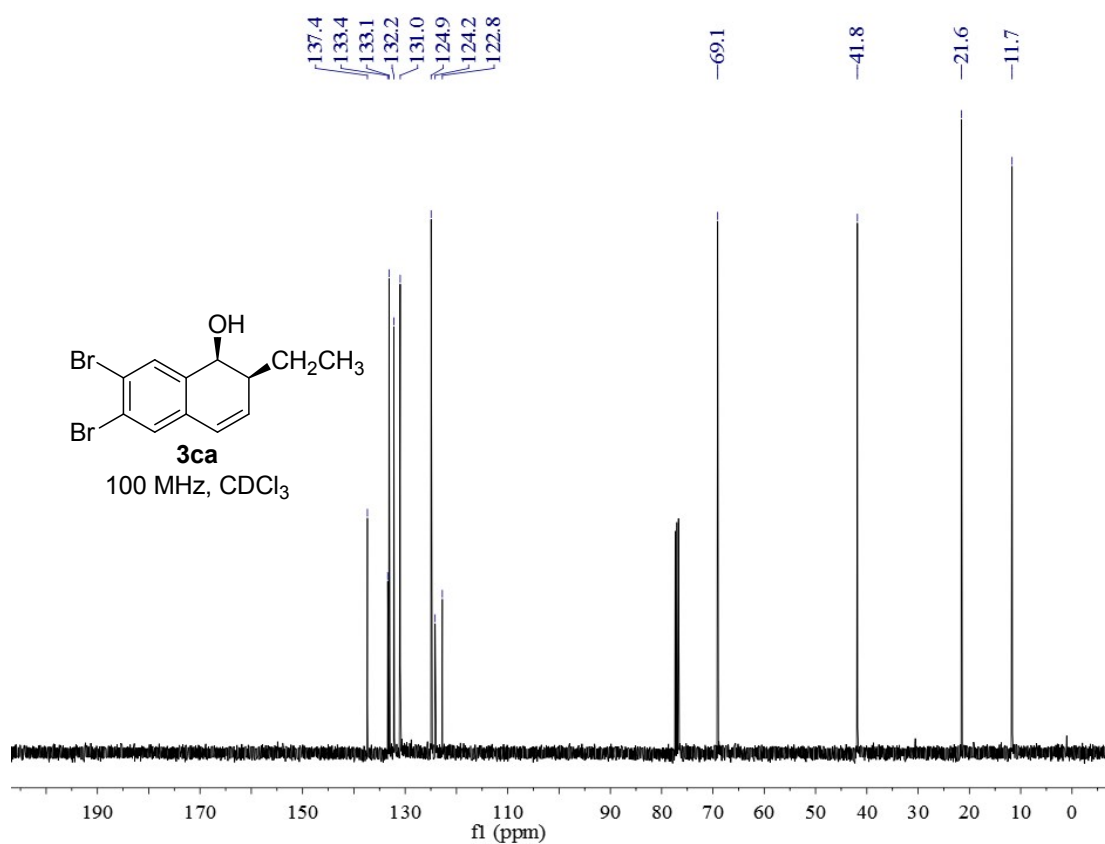

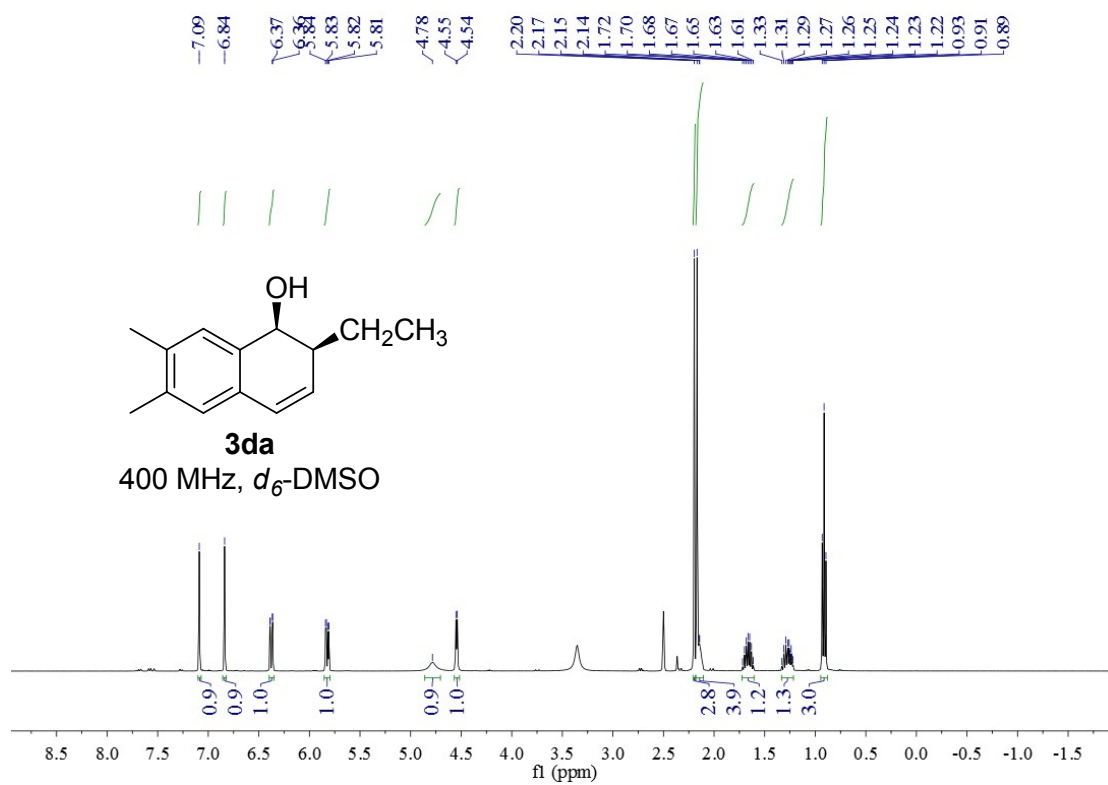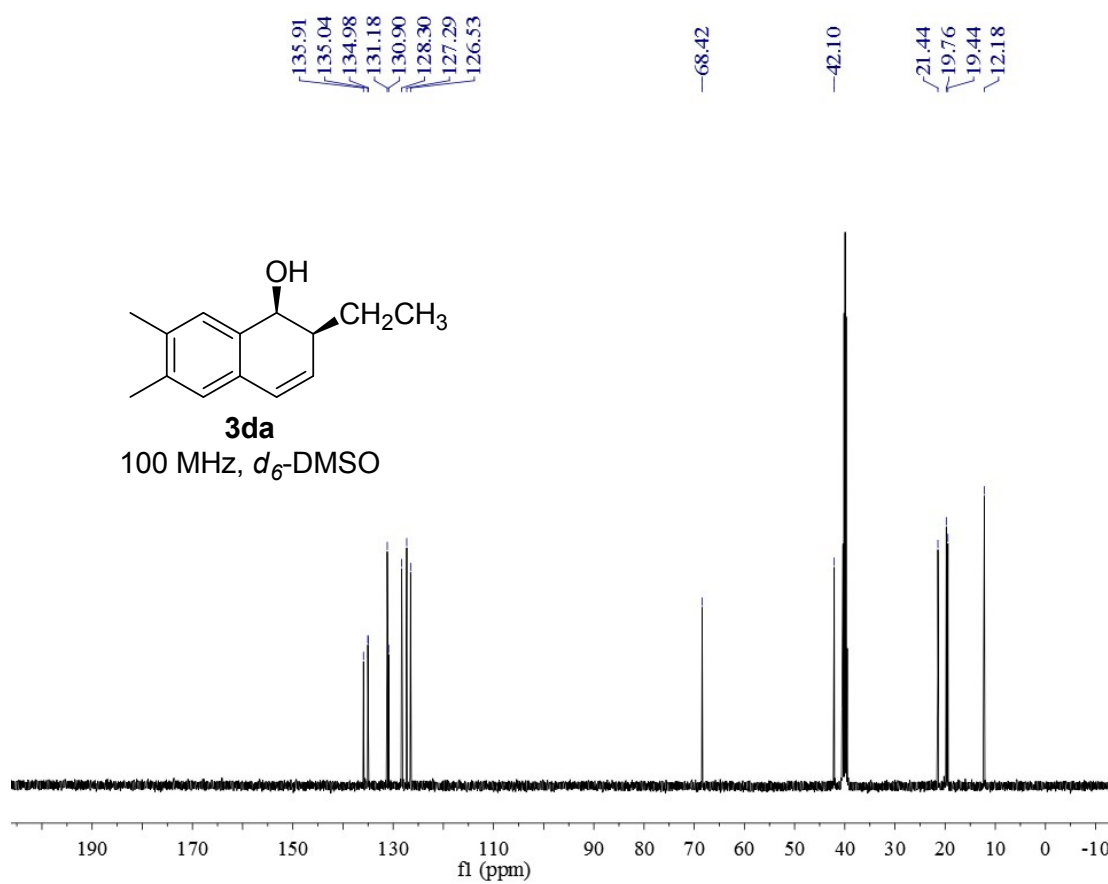

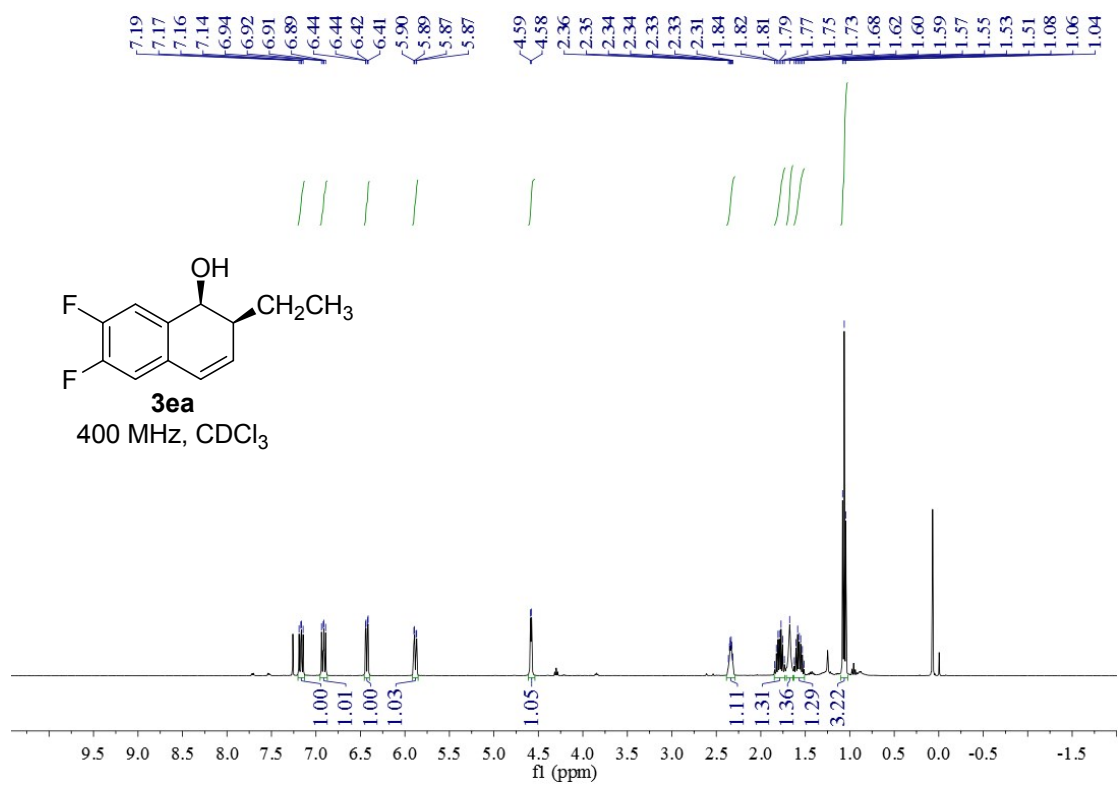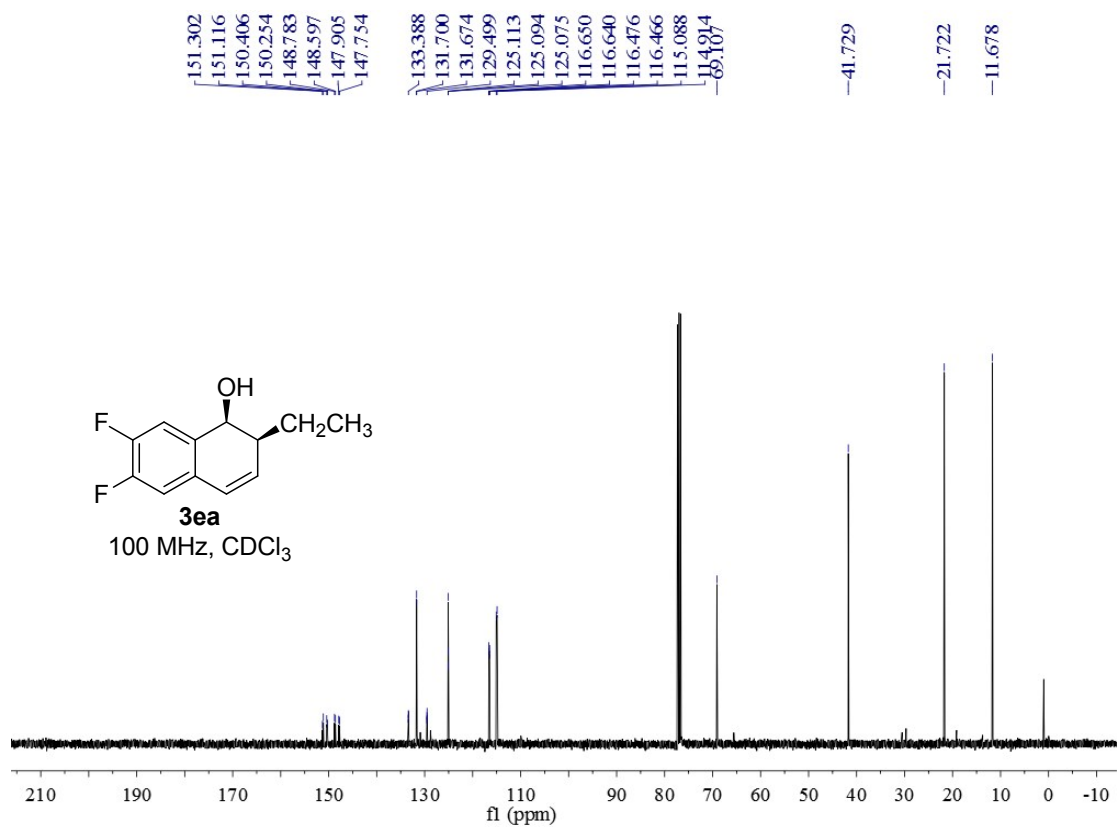

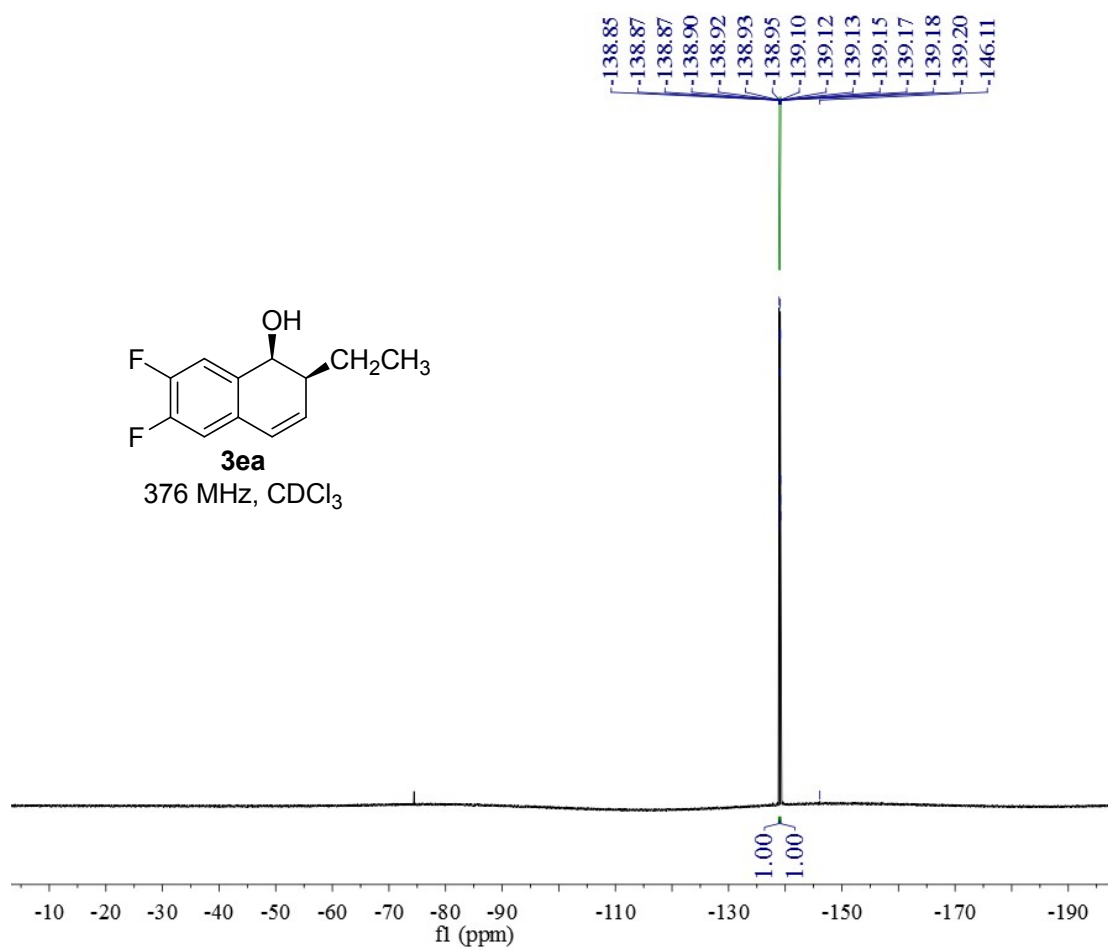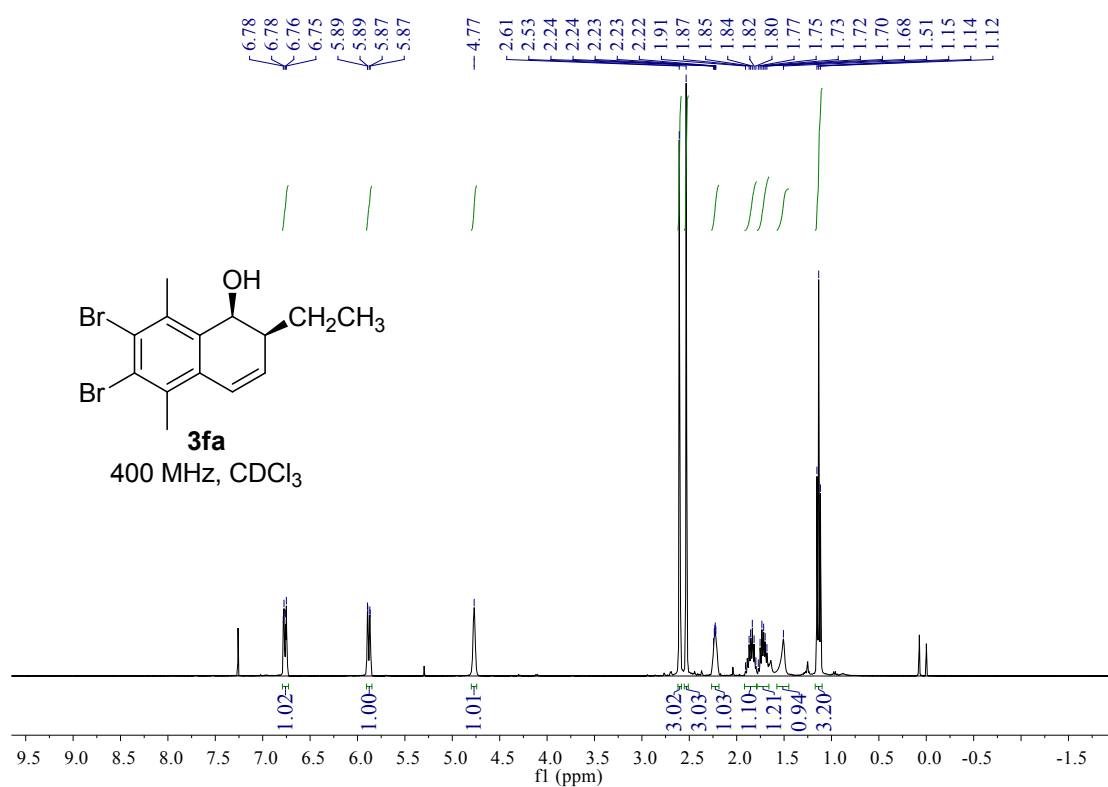



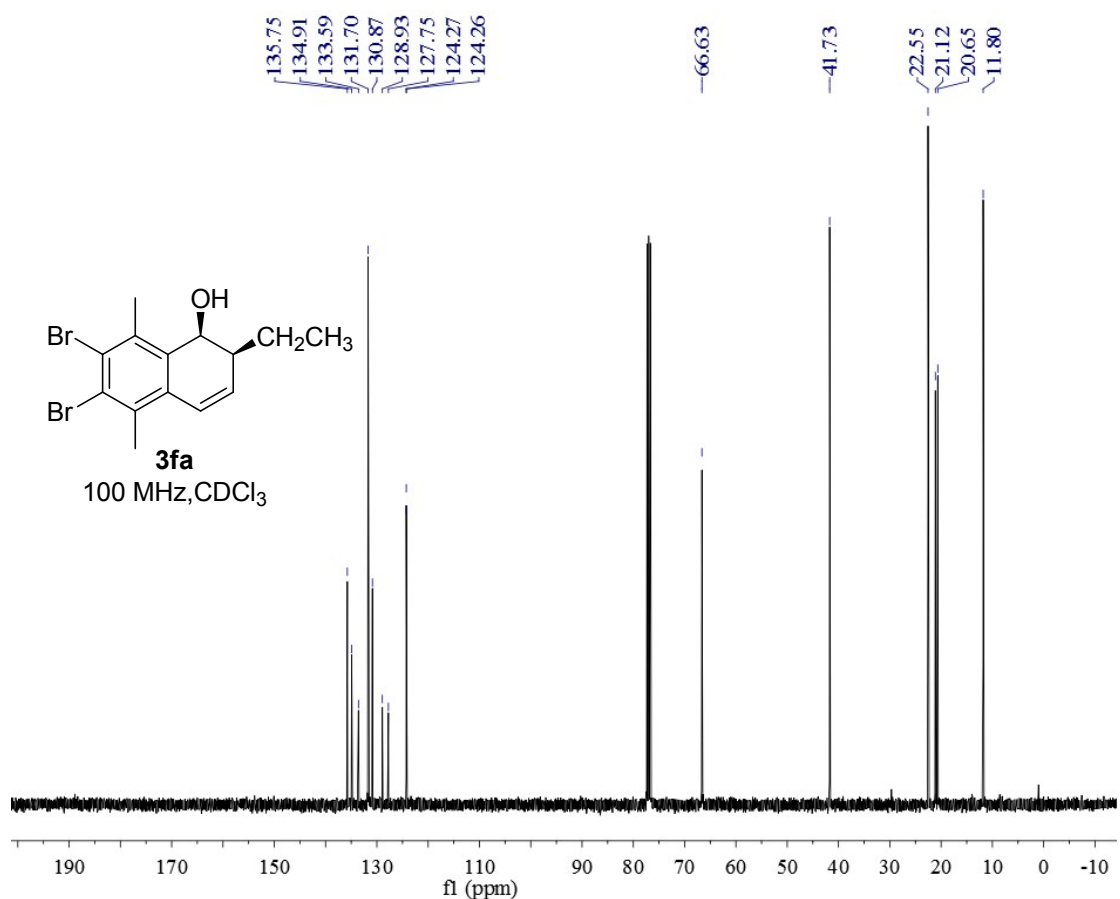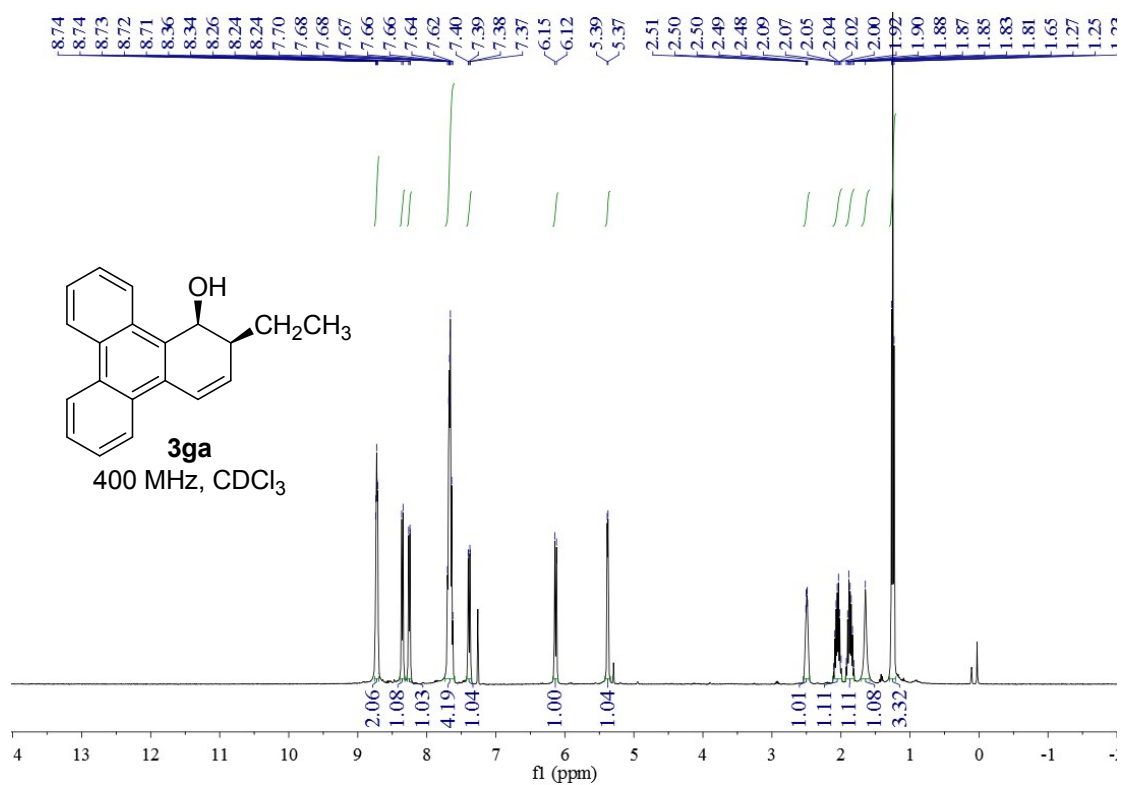

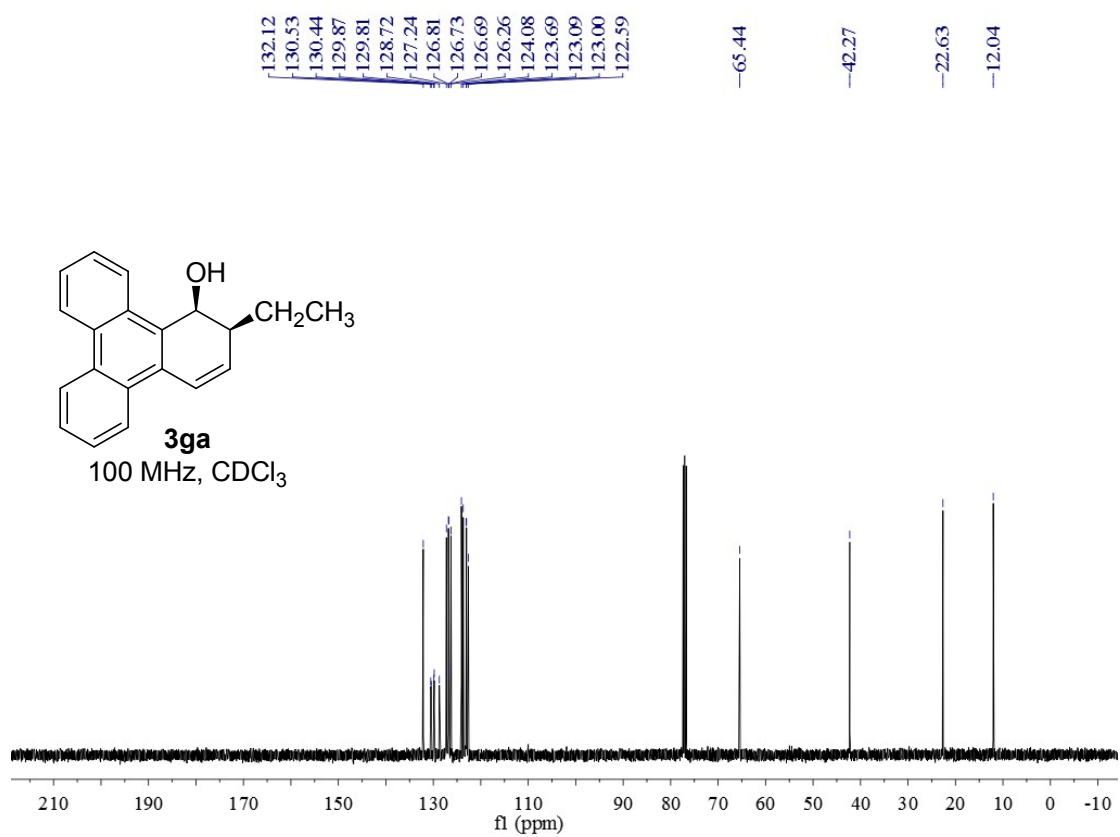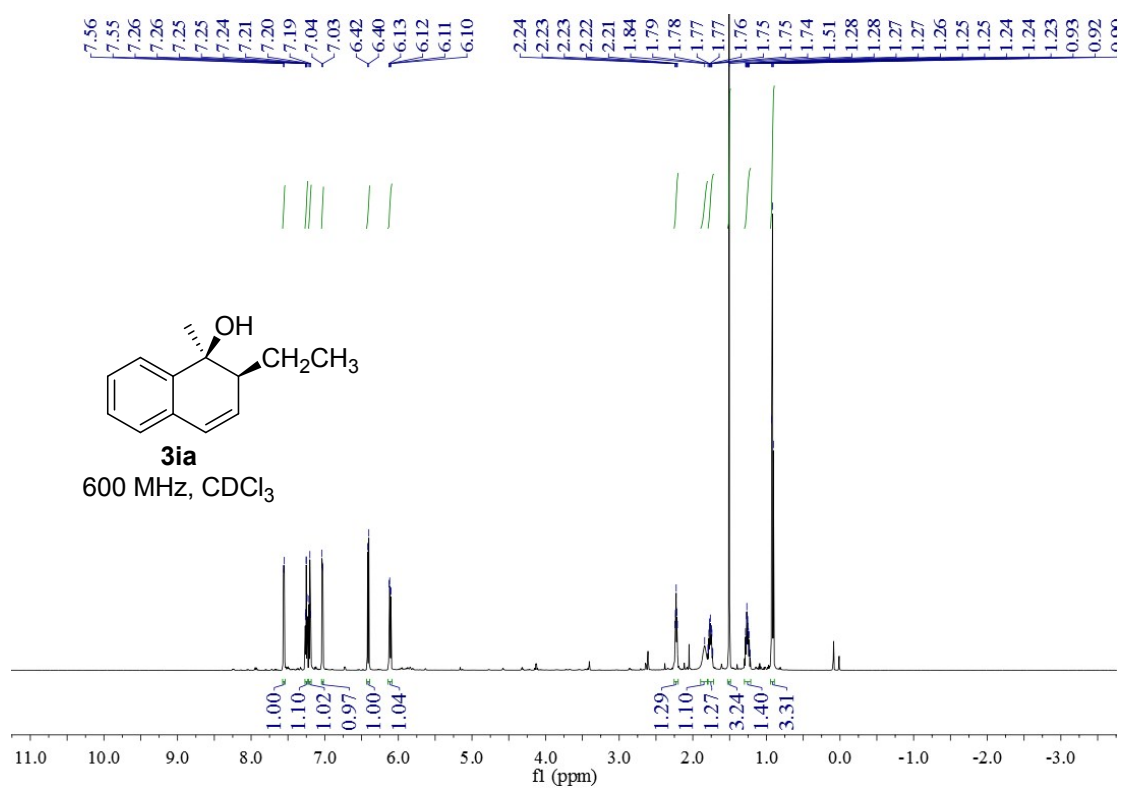

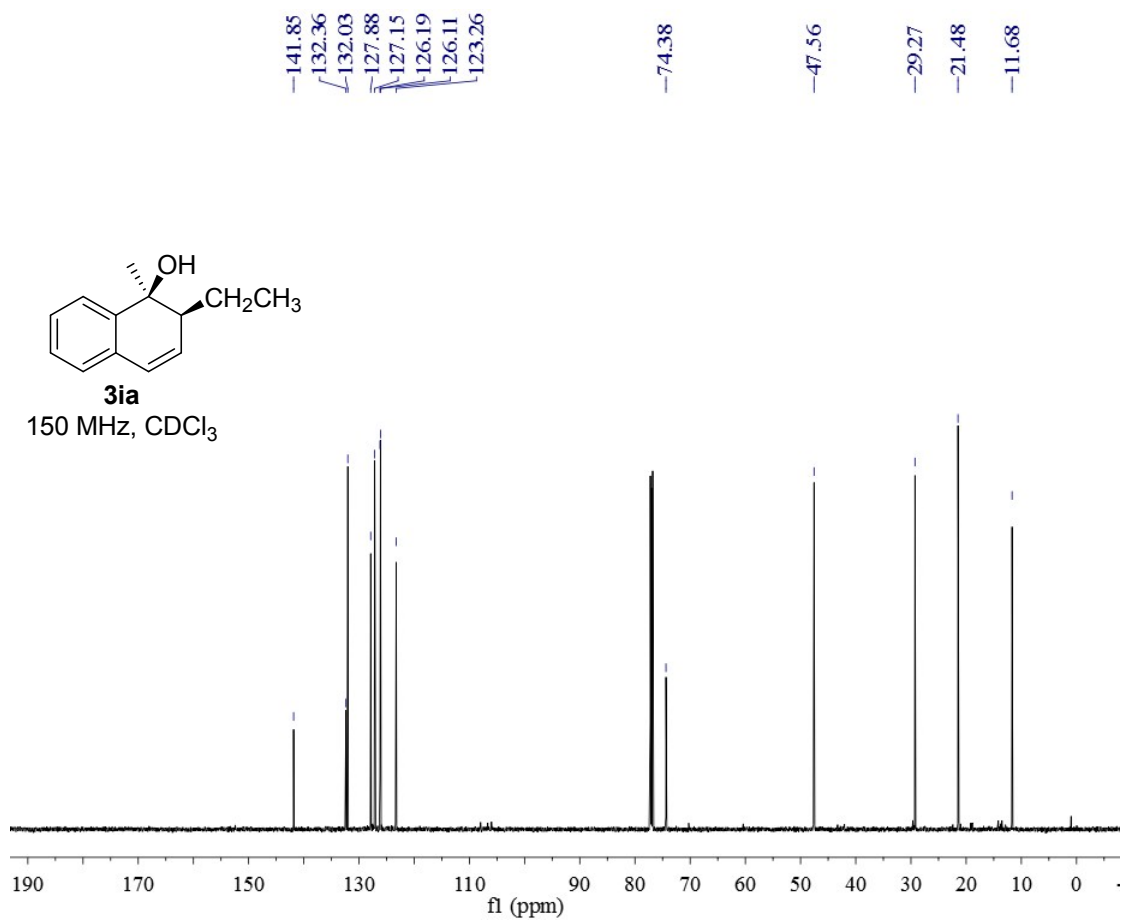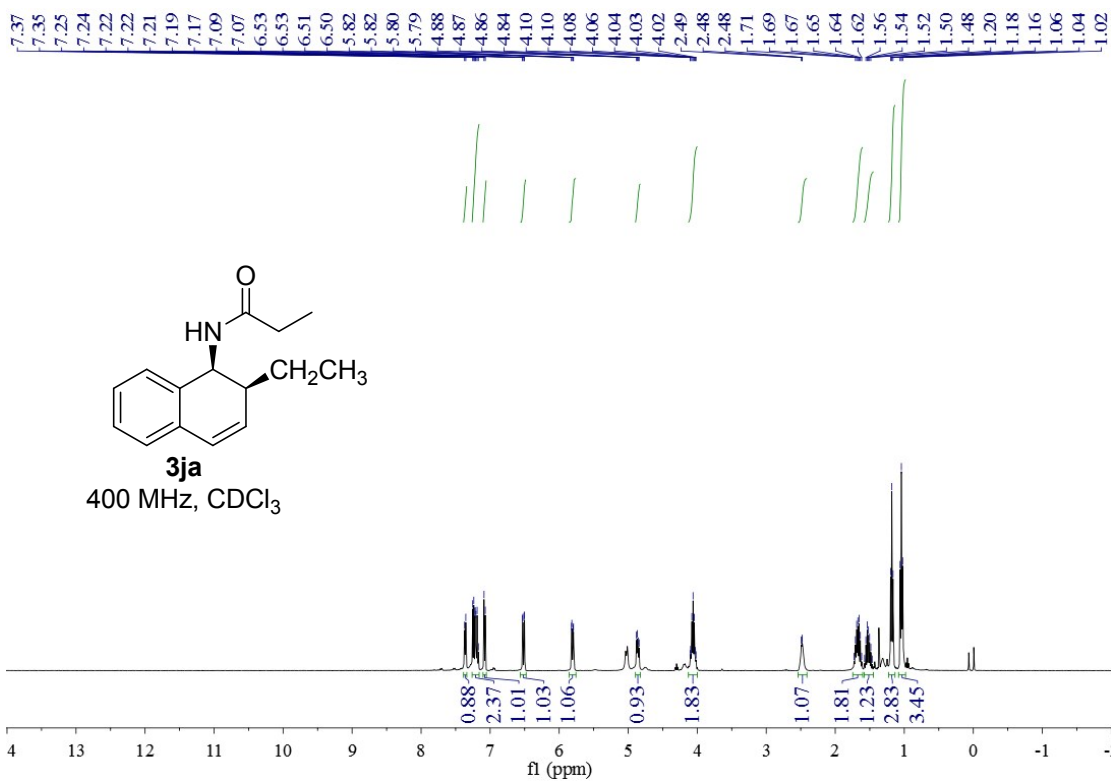

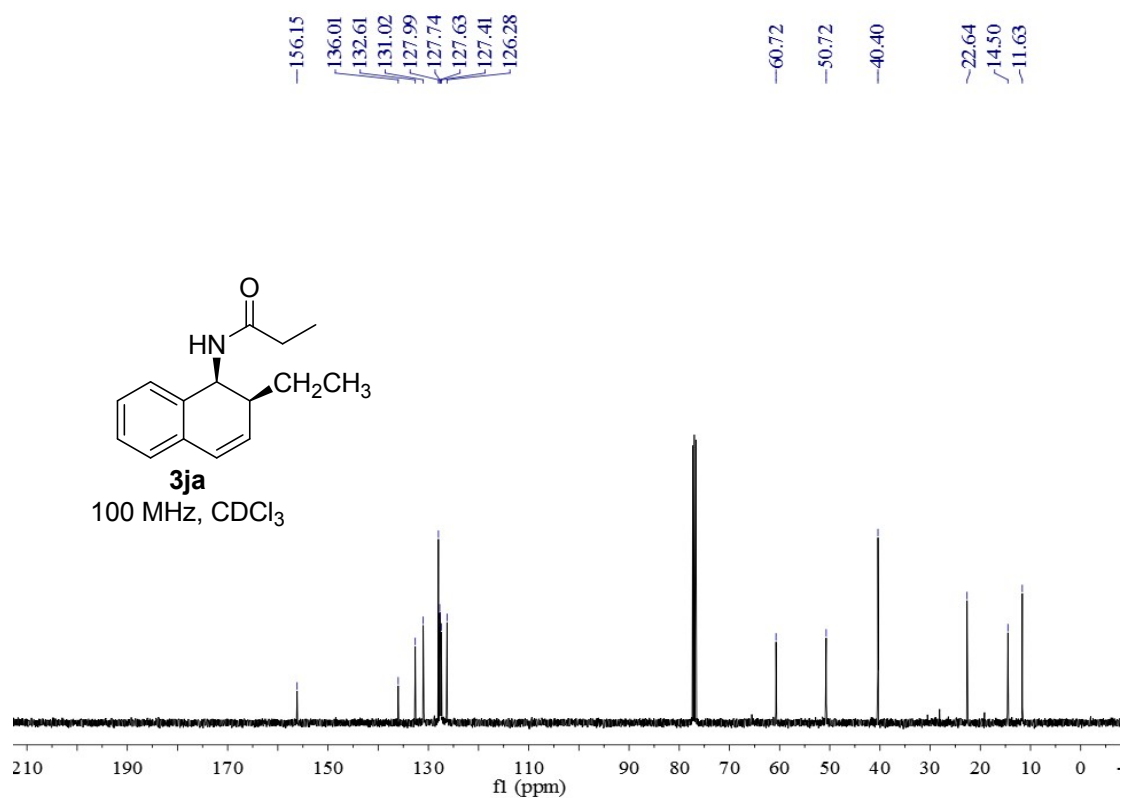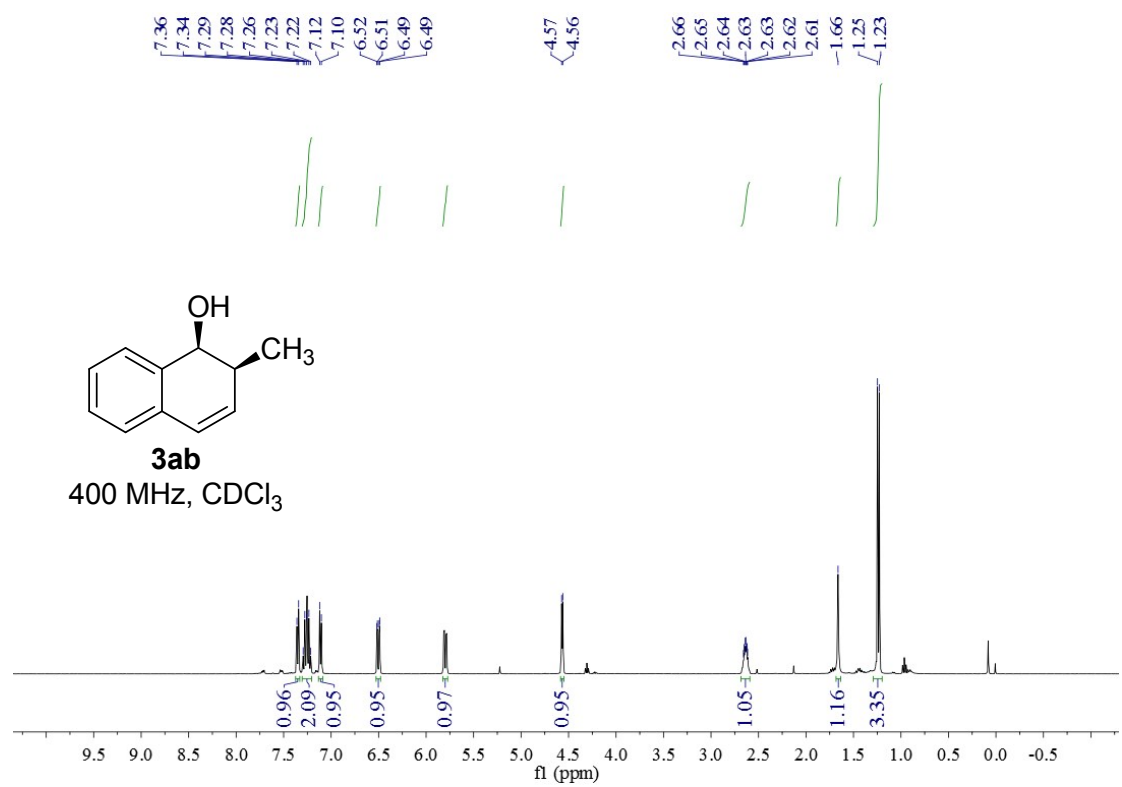

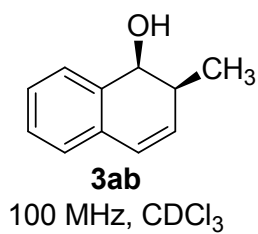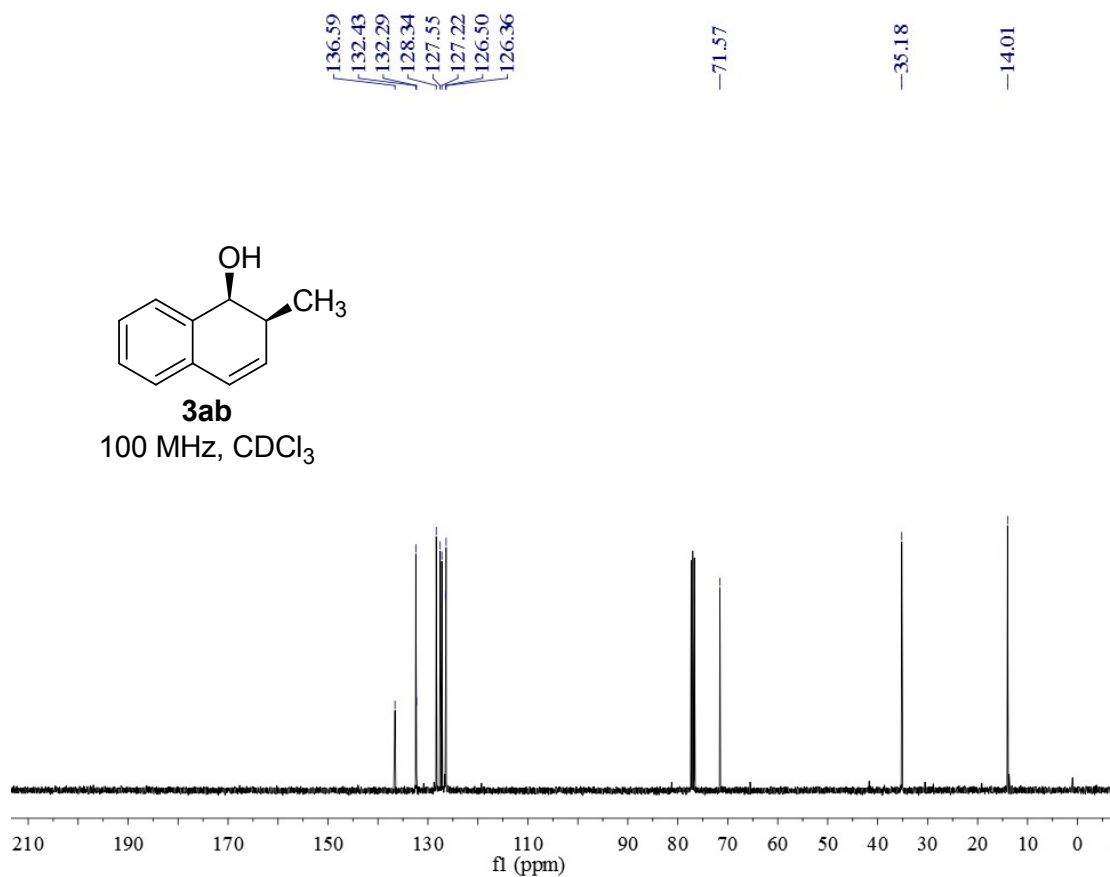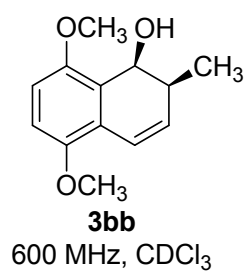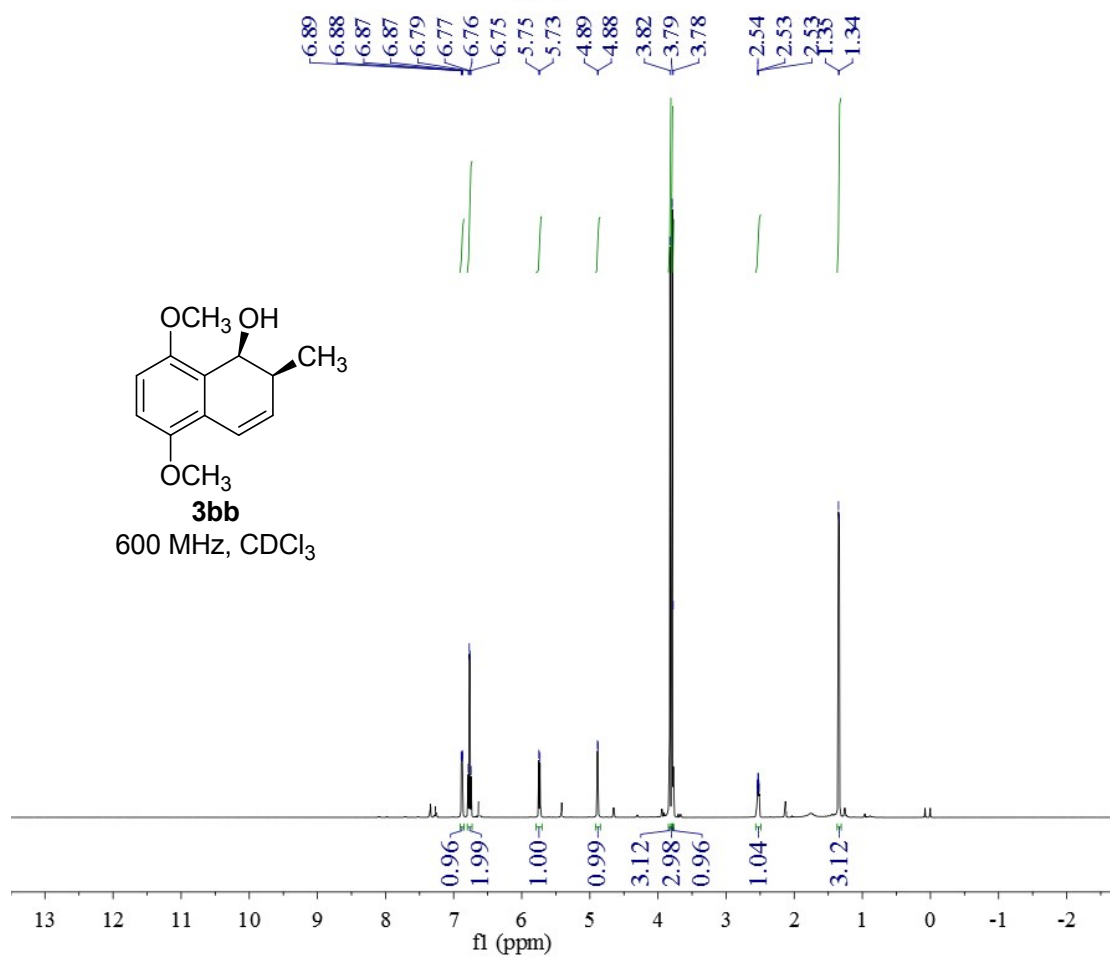

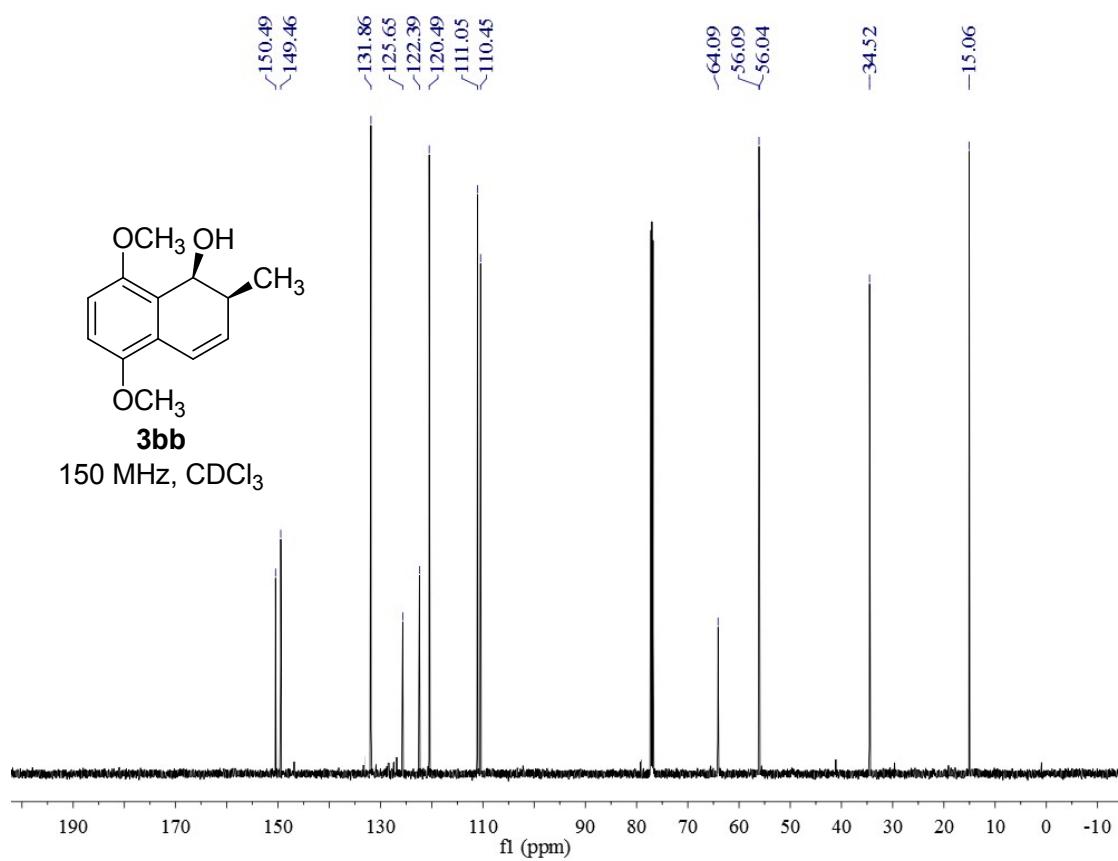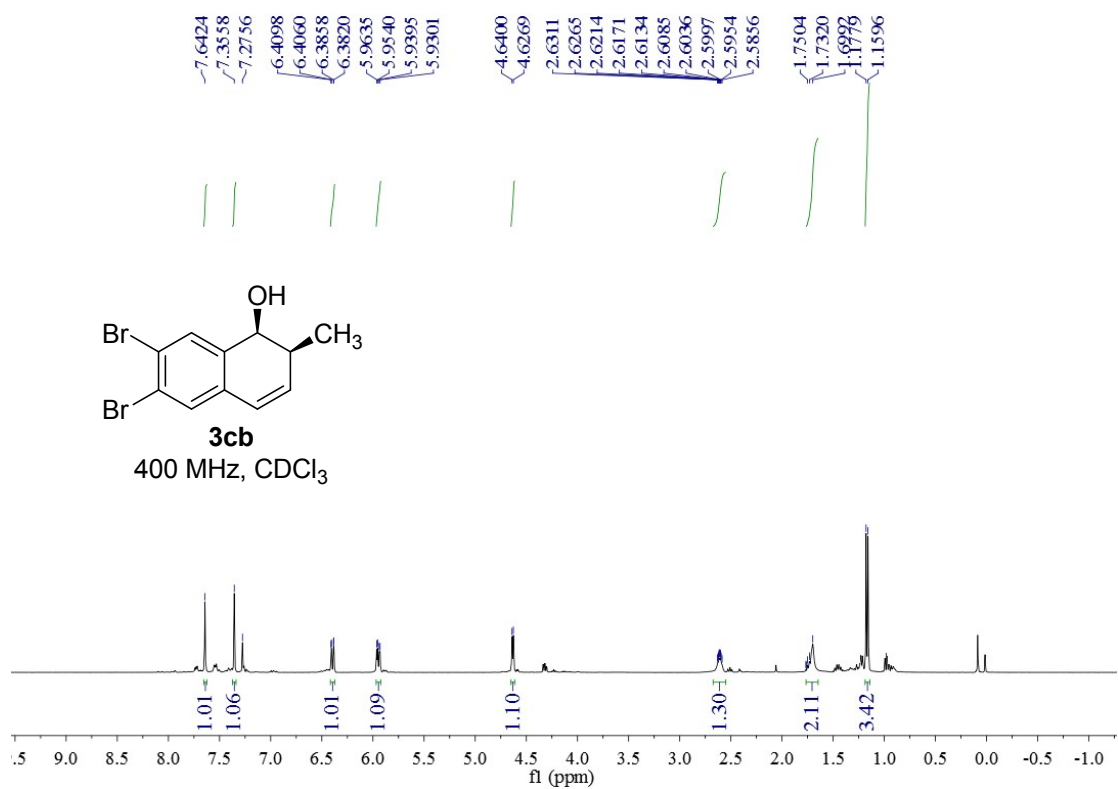

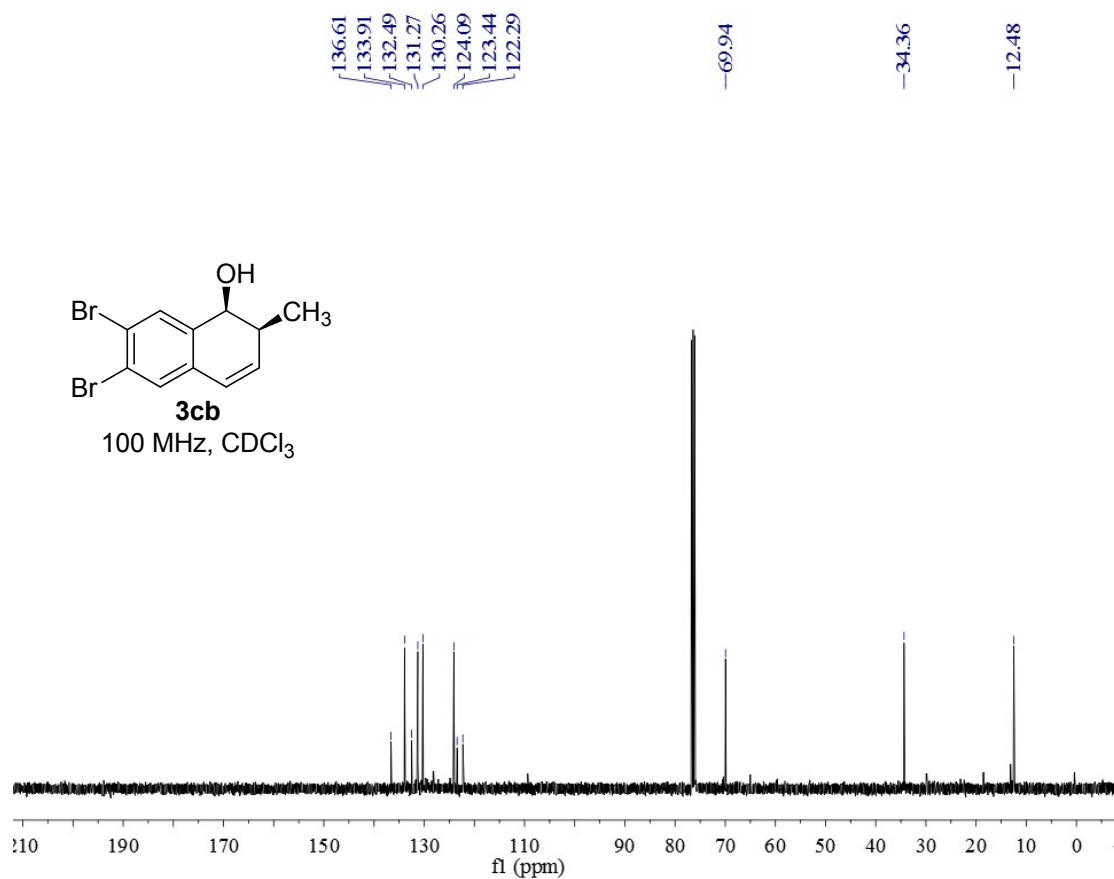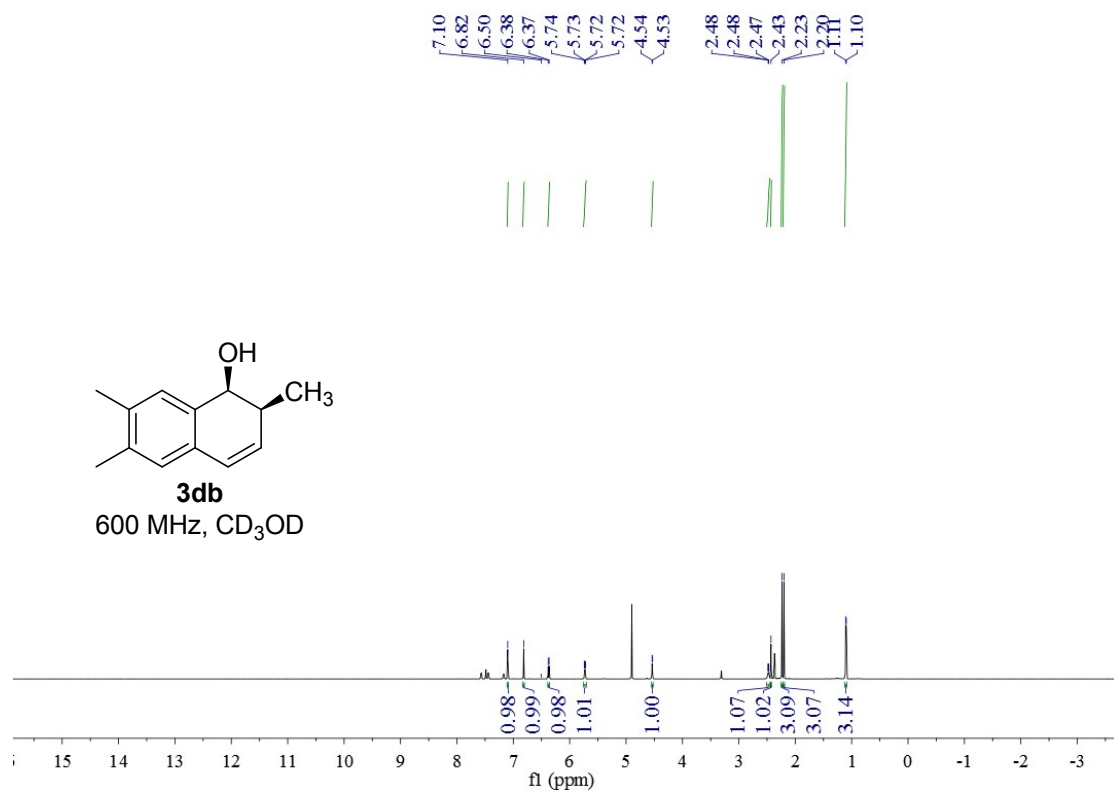

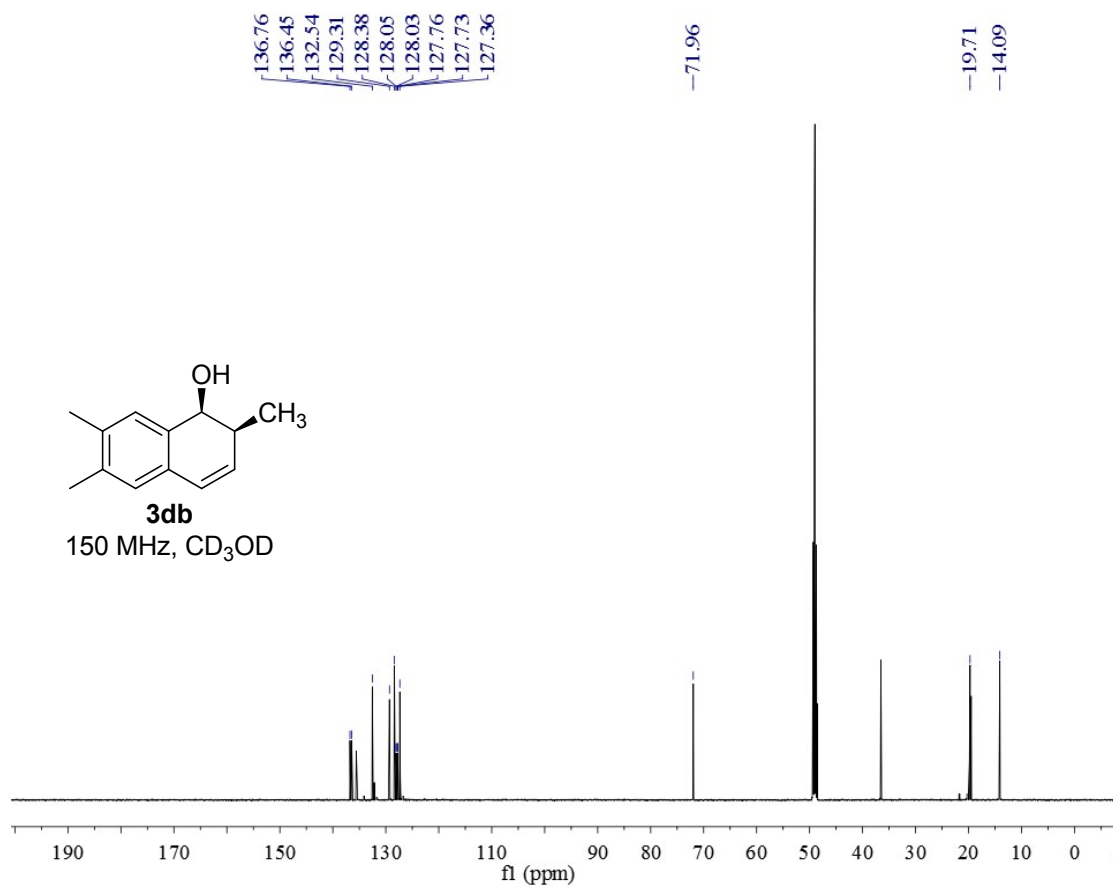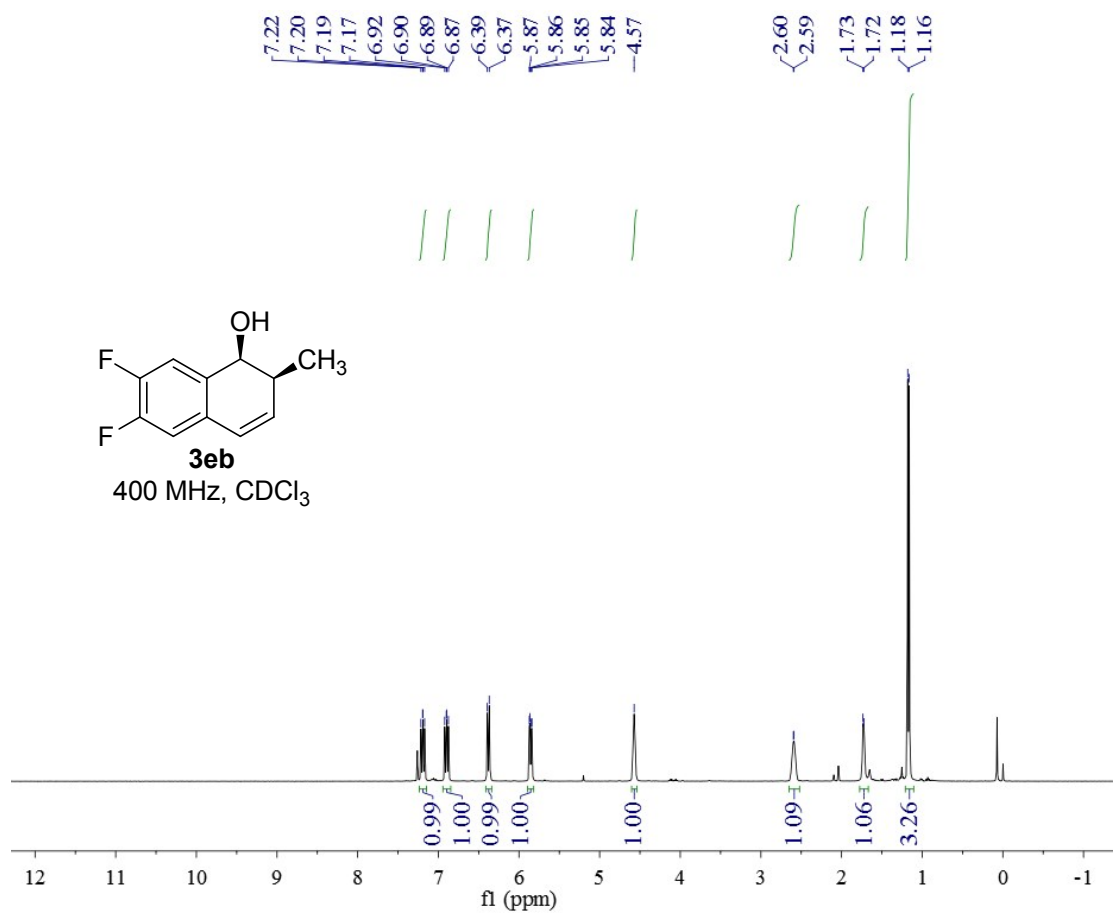



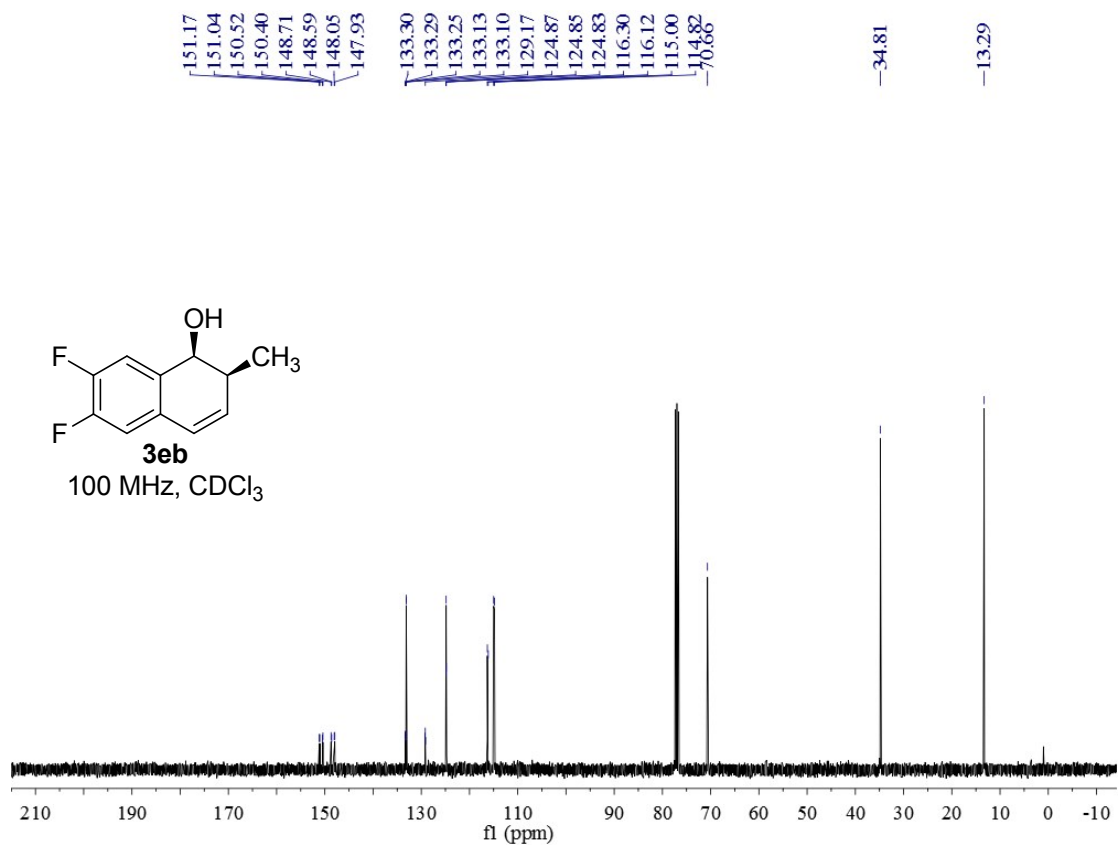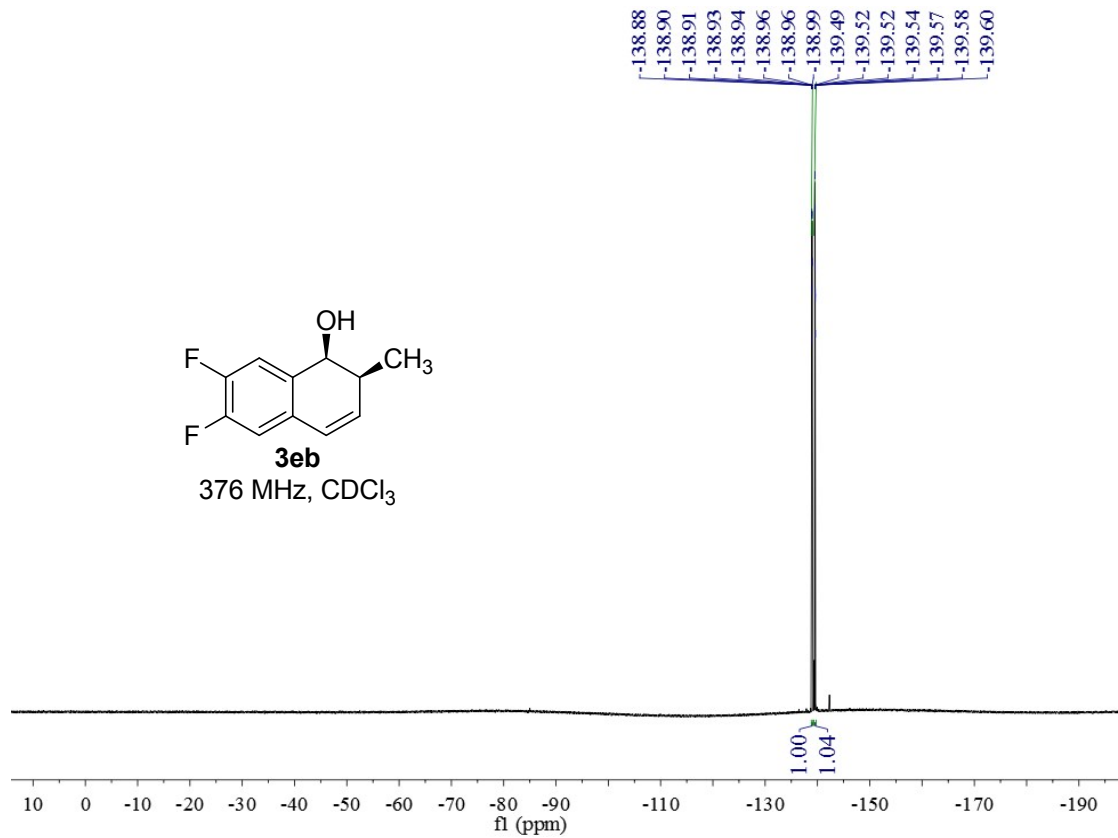

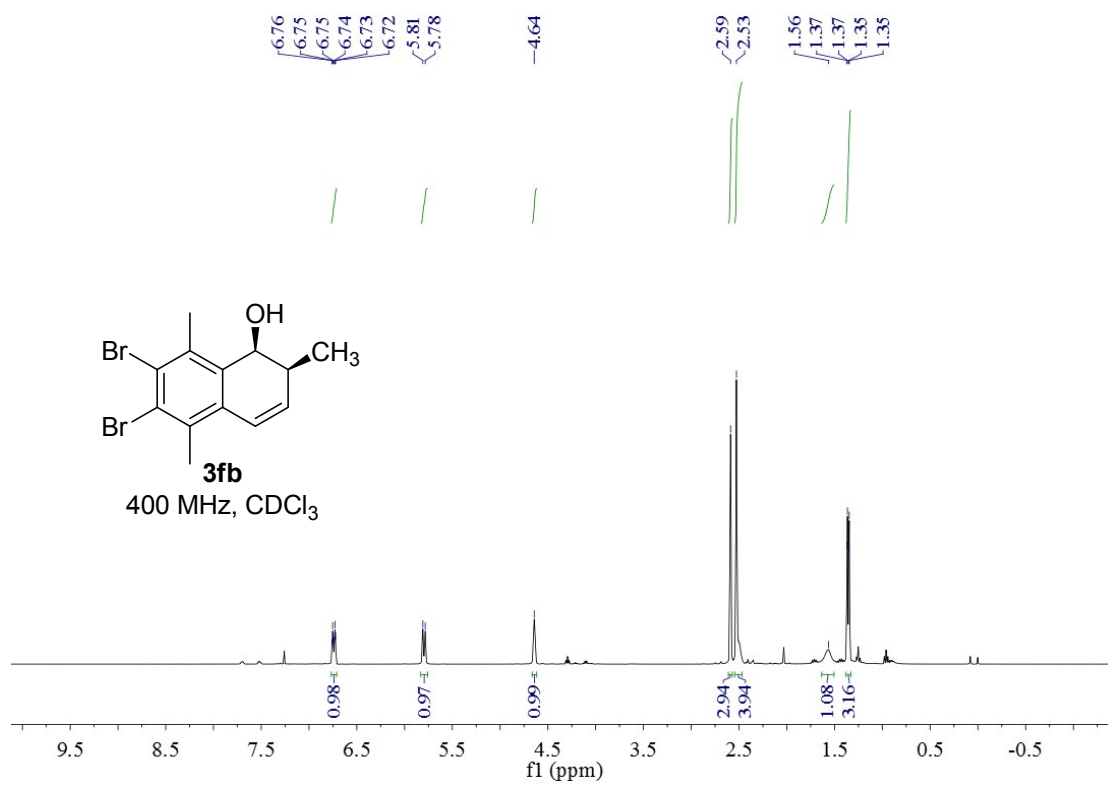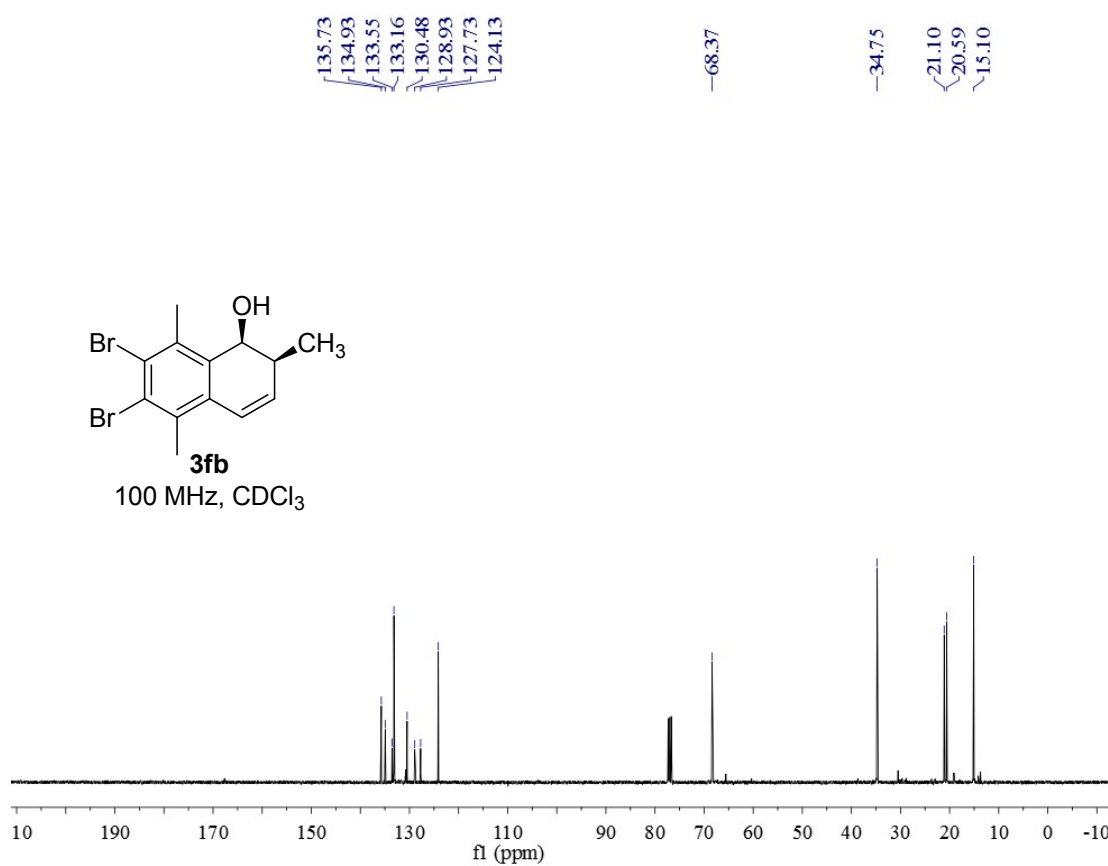

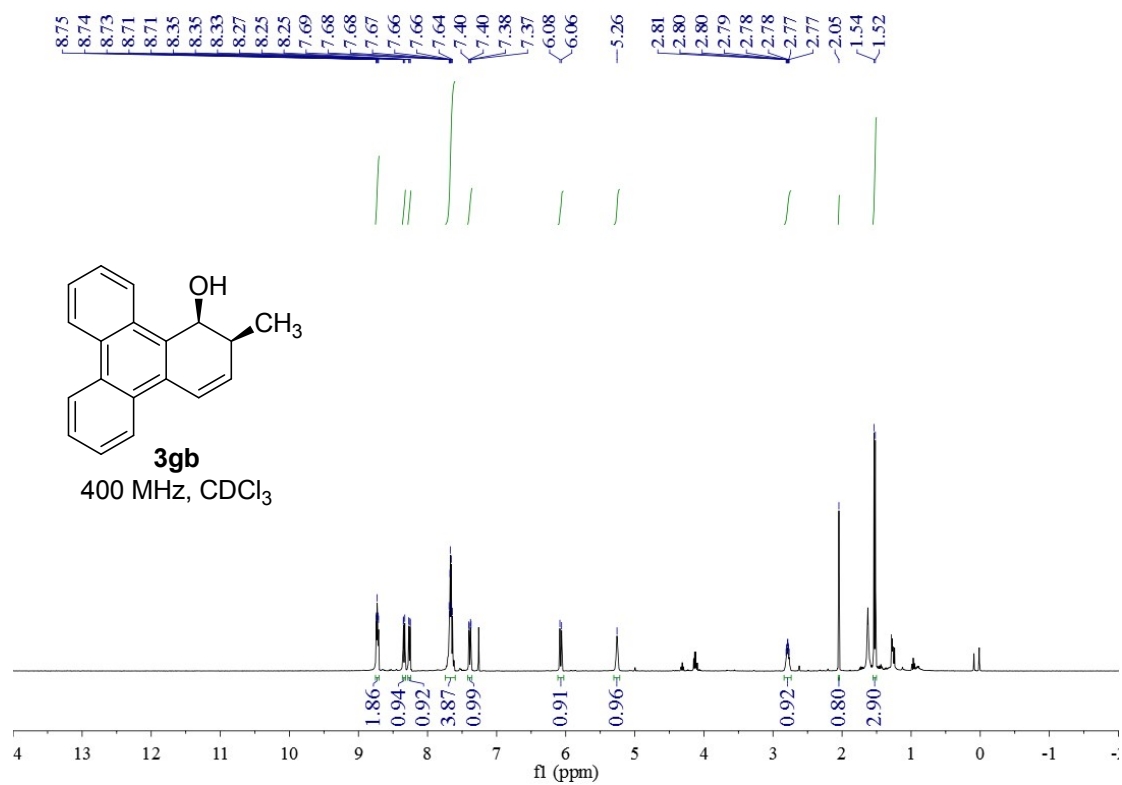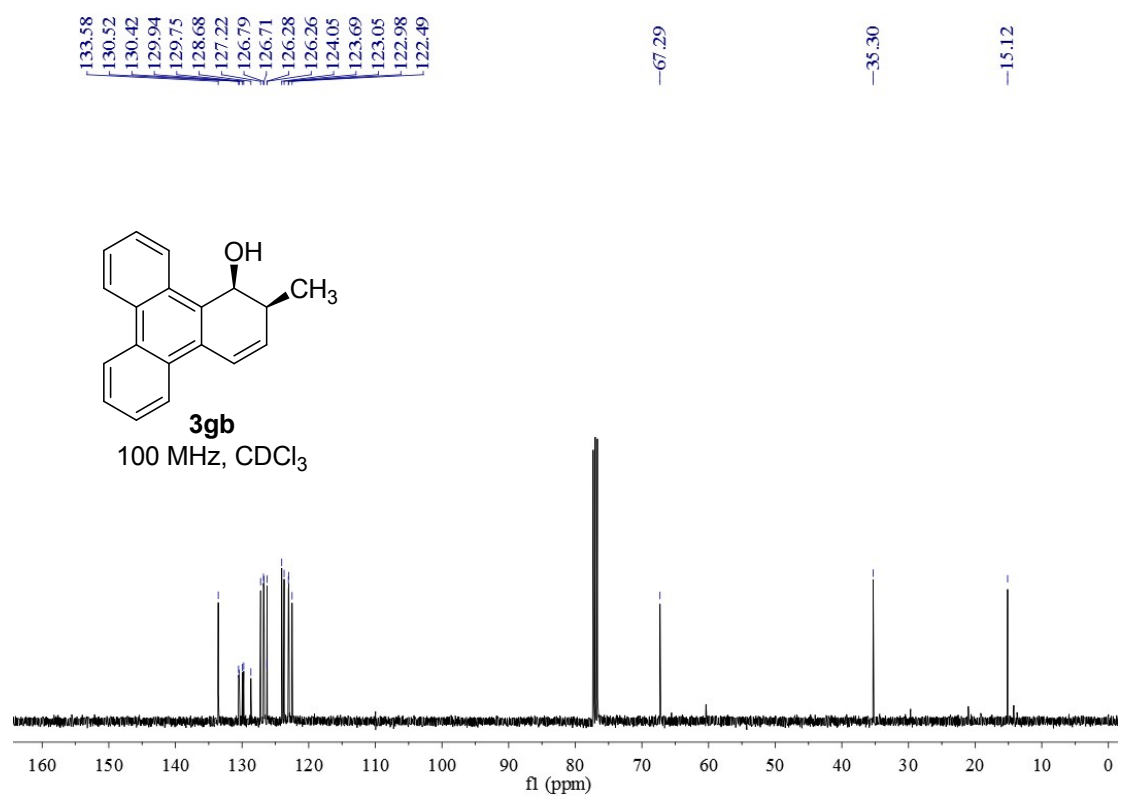

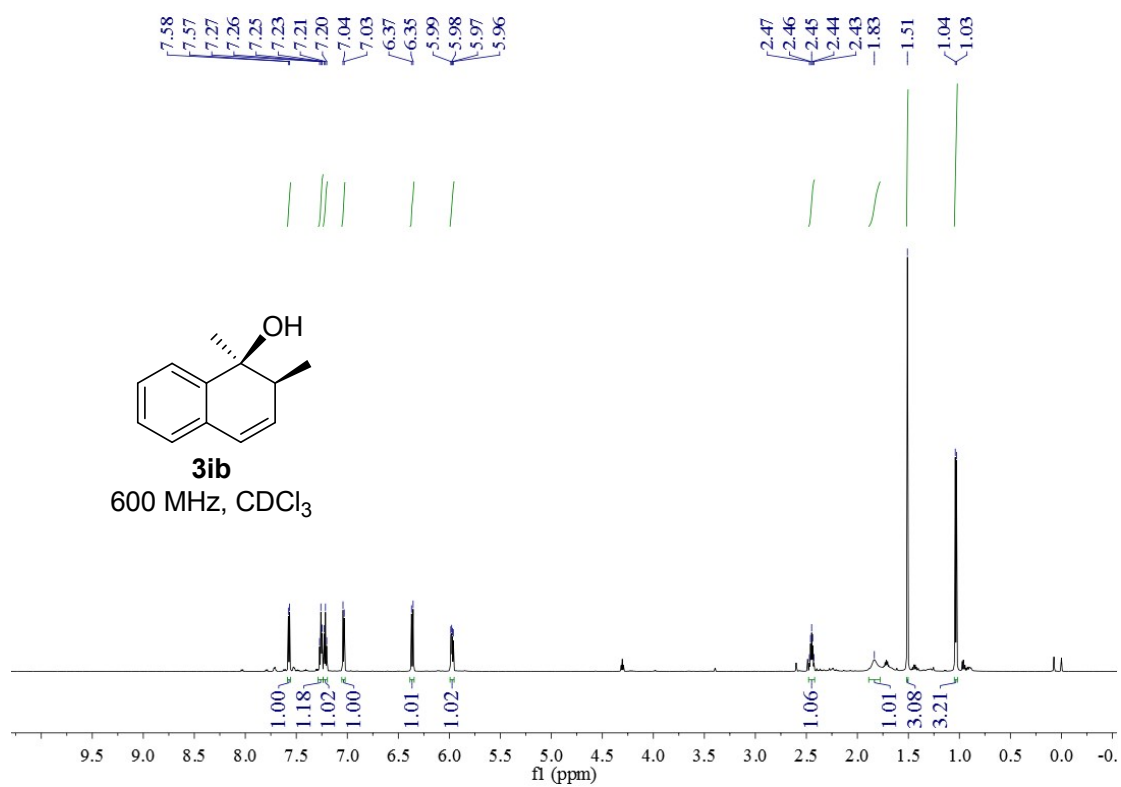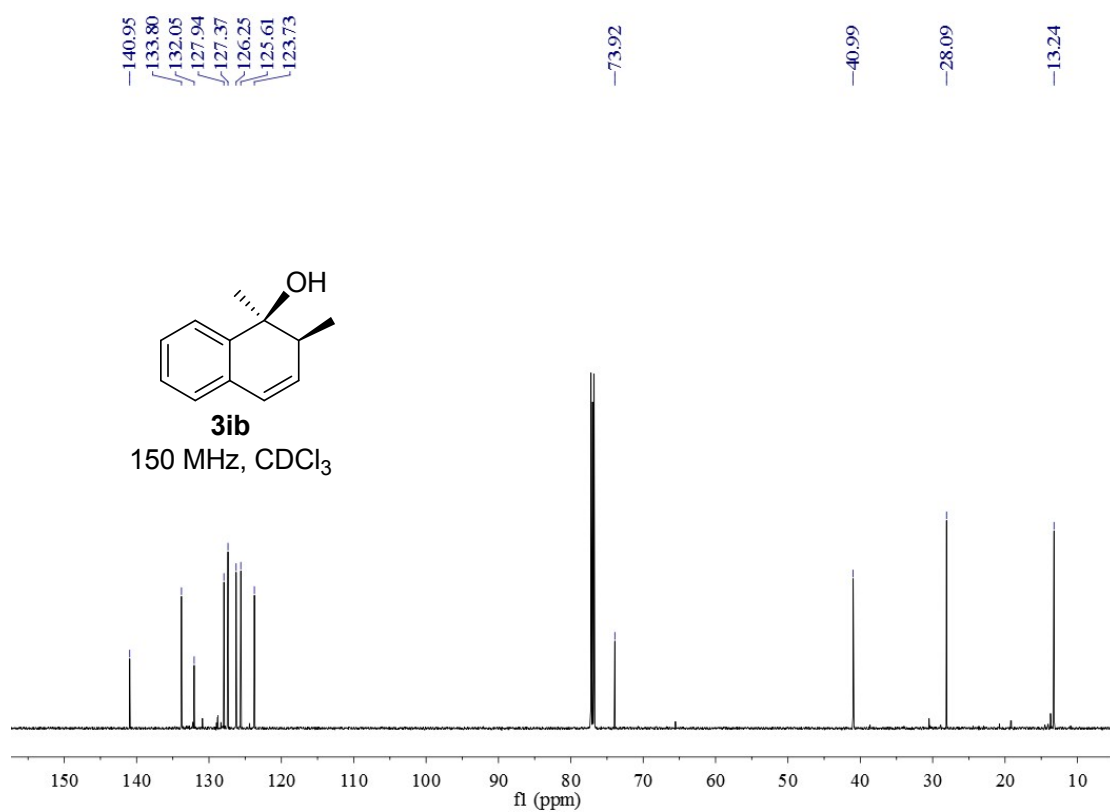

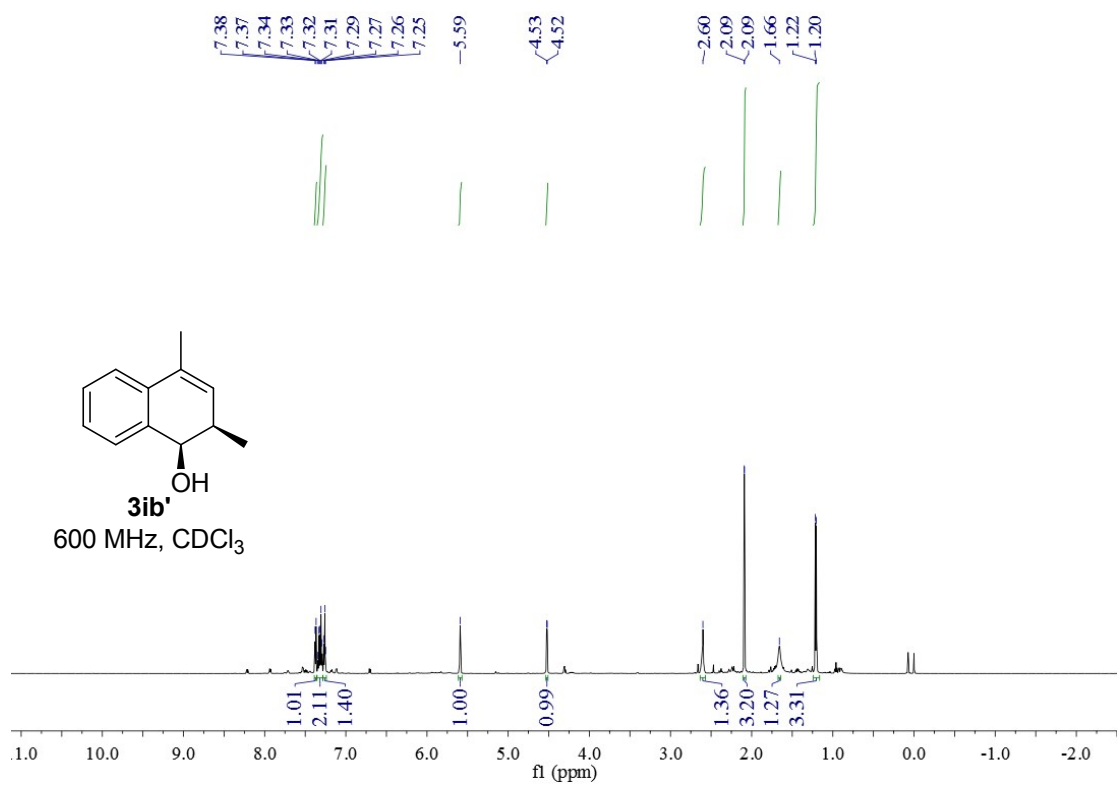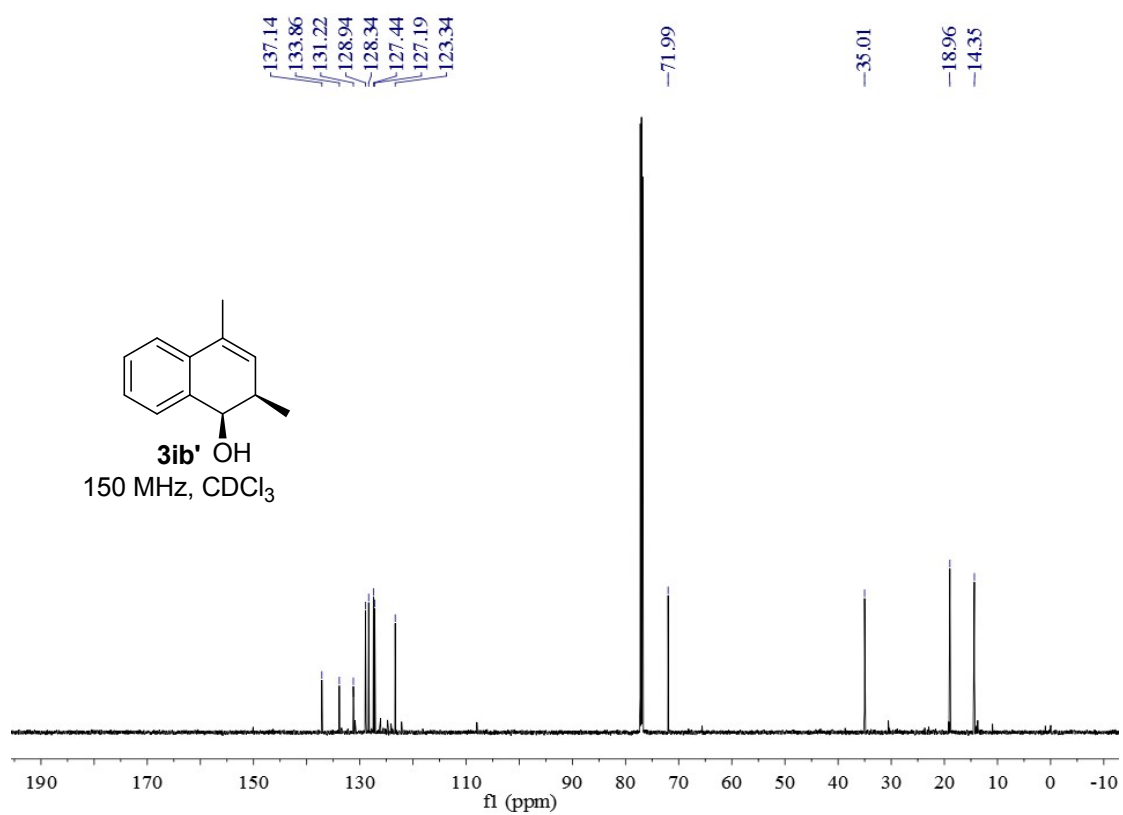

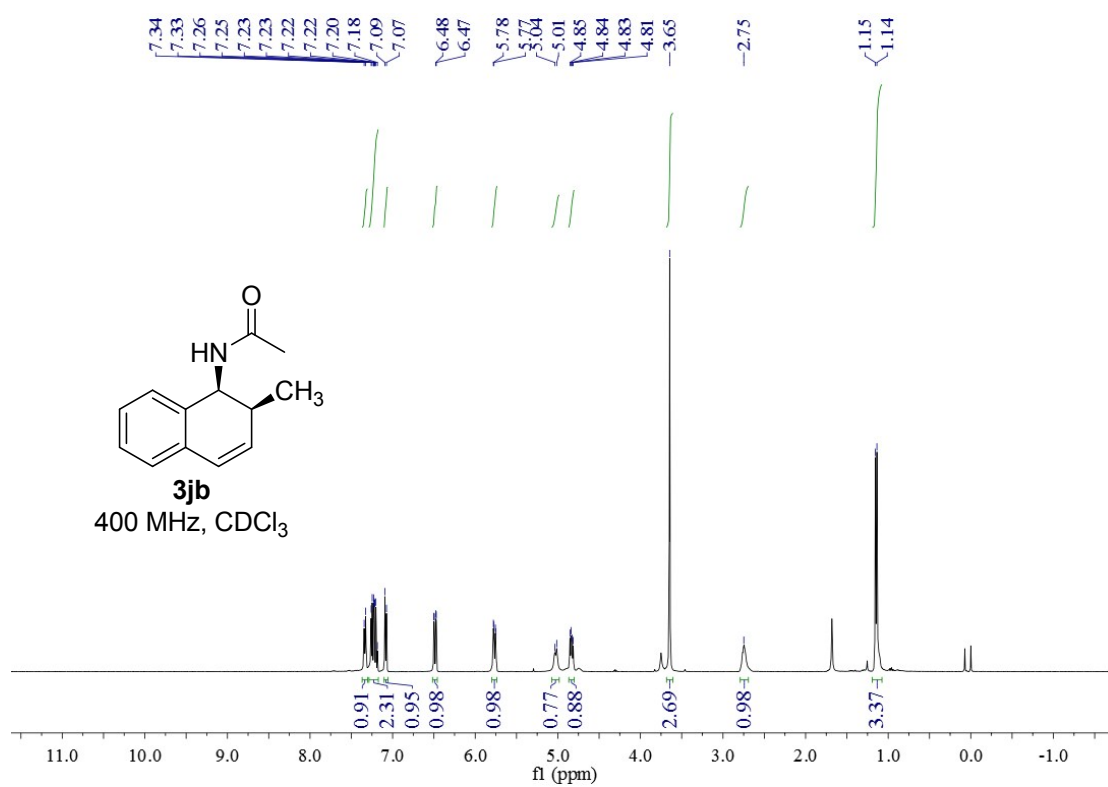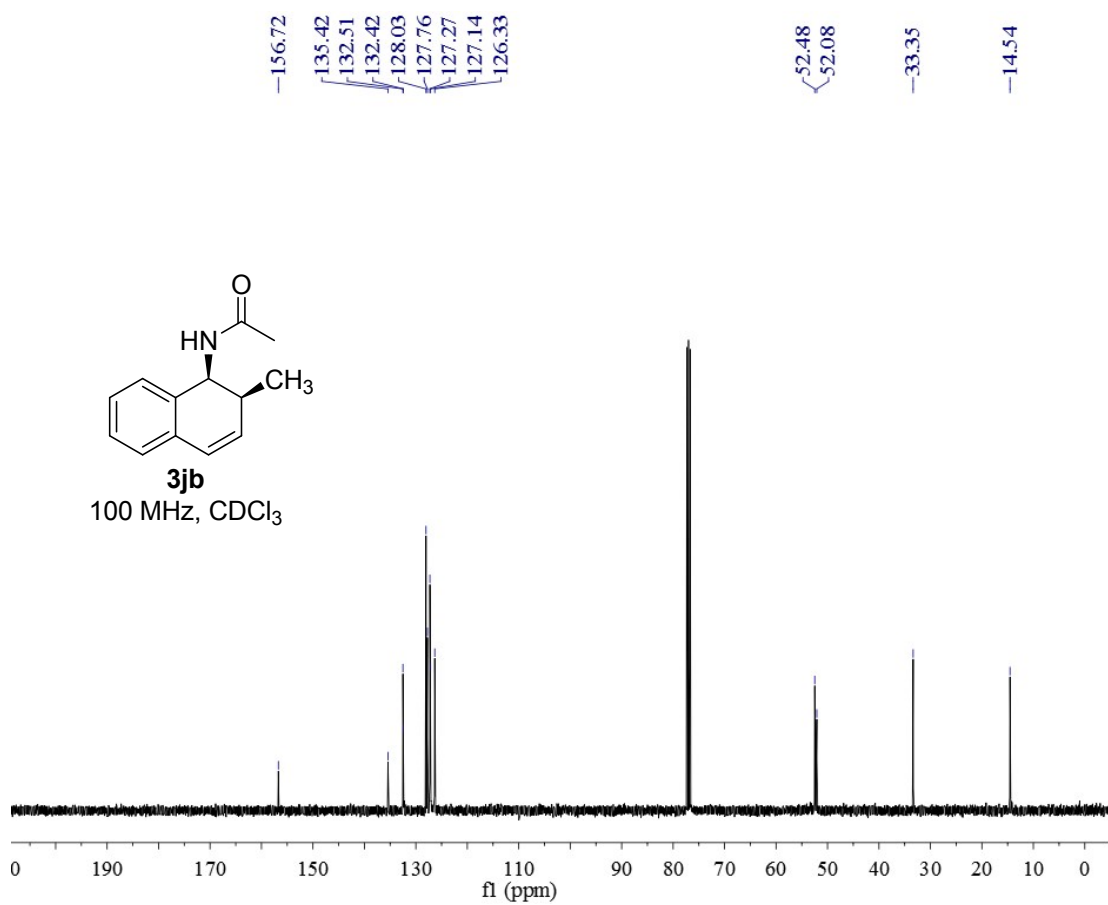

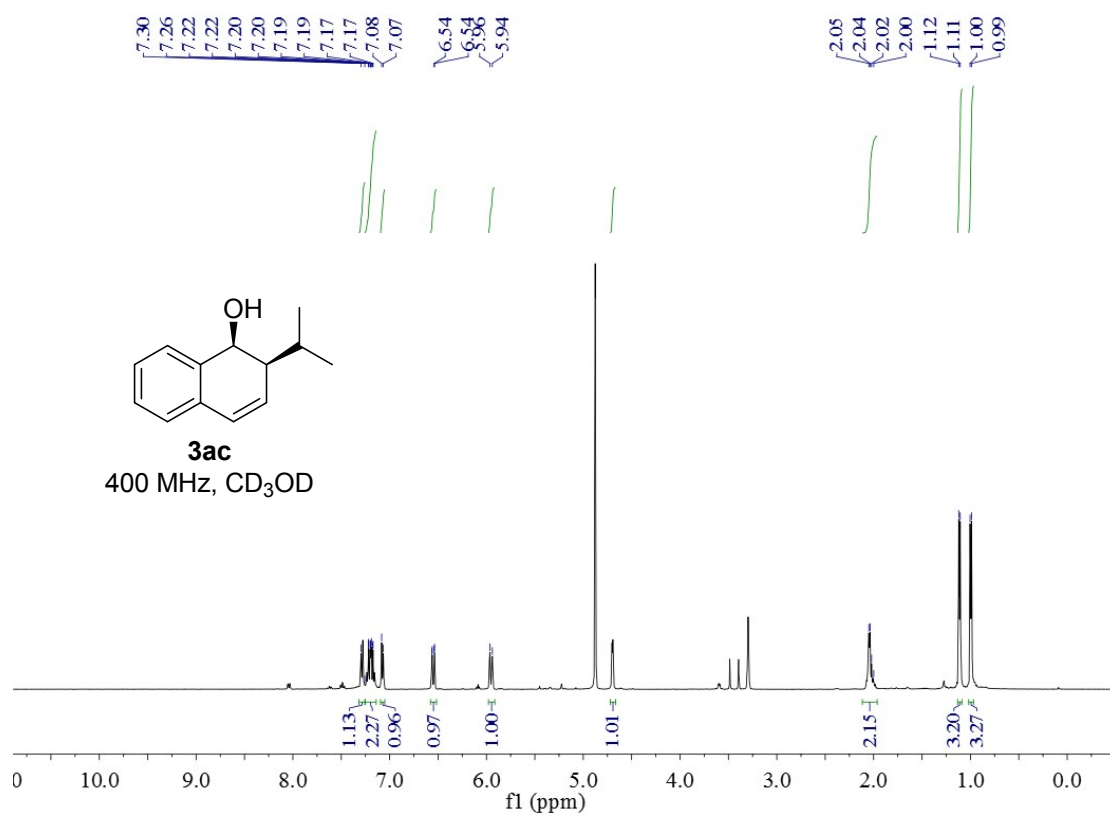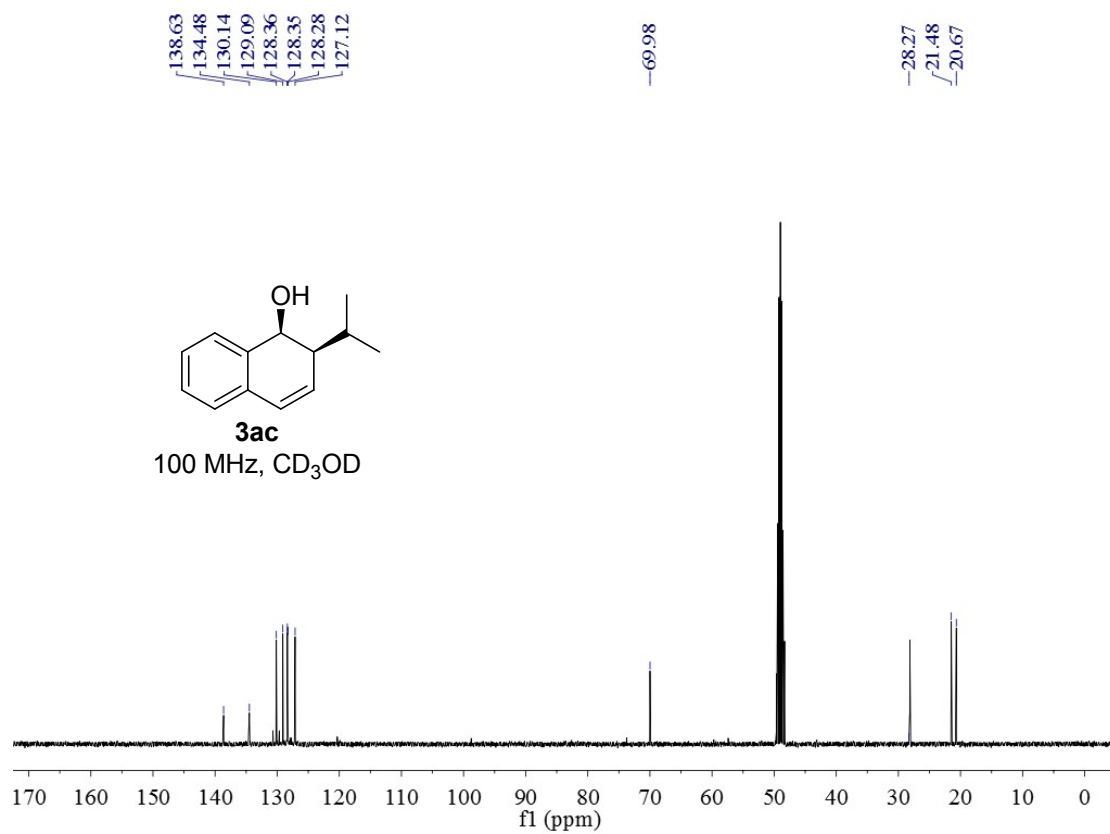

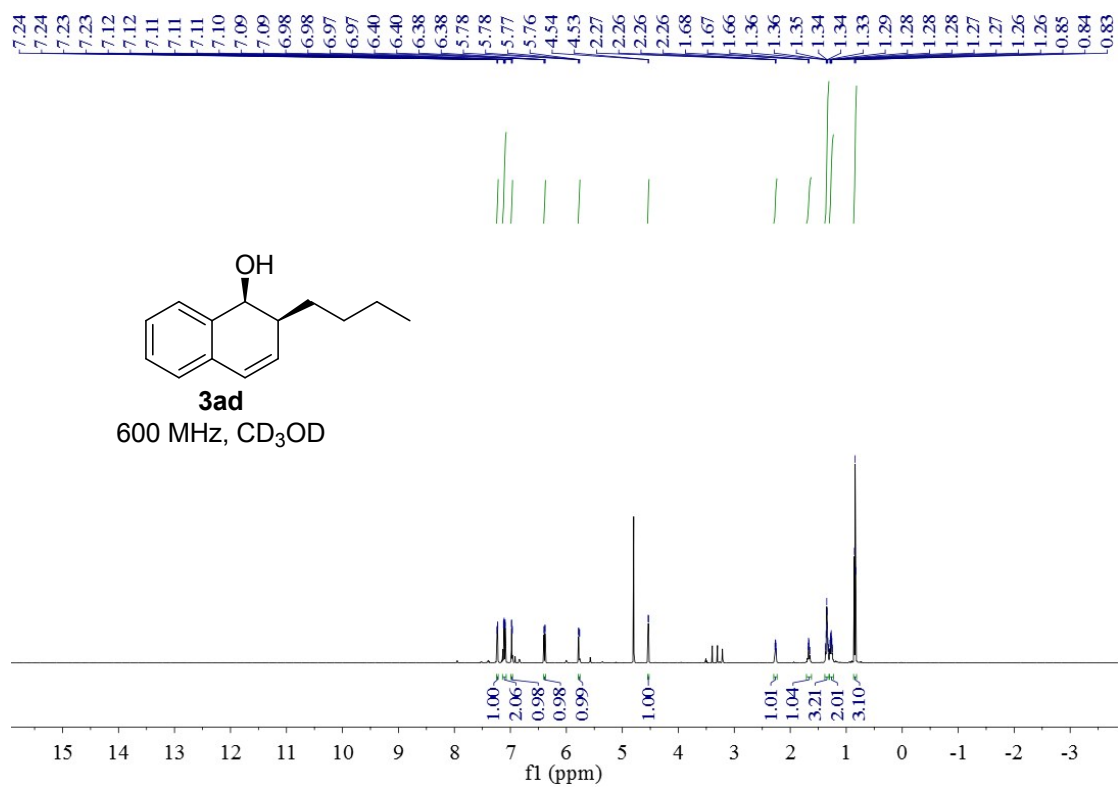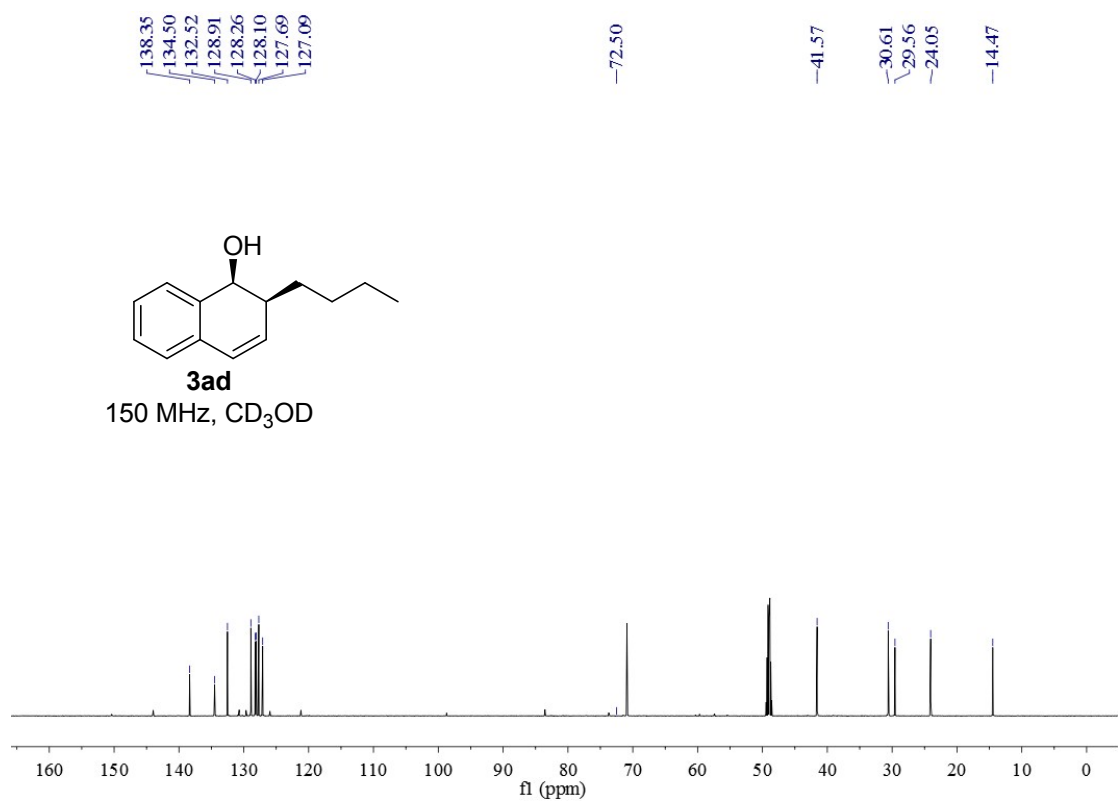



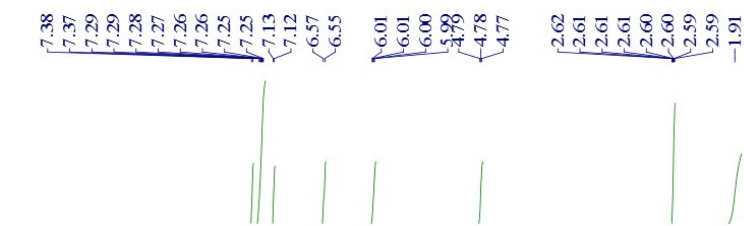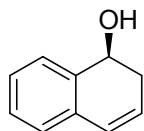

**4aa**

500 MHz, CDCl<sub>3</sub>

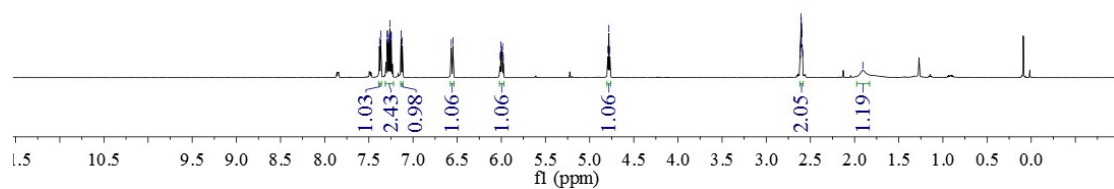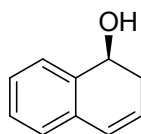

**4aa**

125 MHz, CDCl<sub>3</sub>

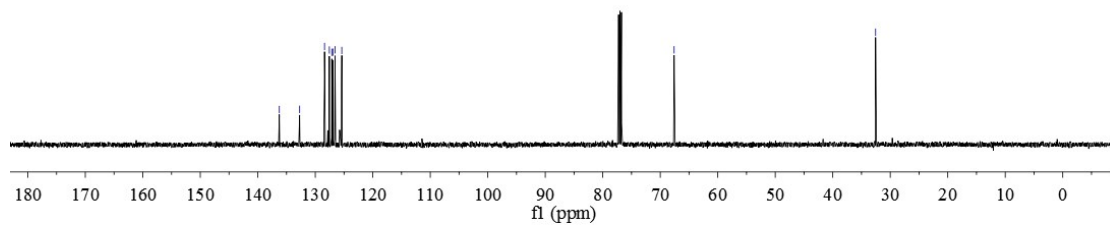

### 3. HPLC chromatograms for compounds

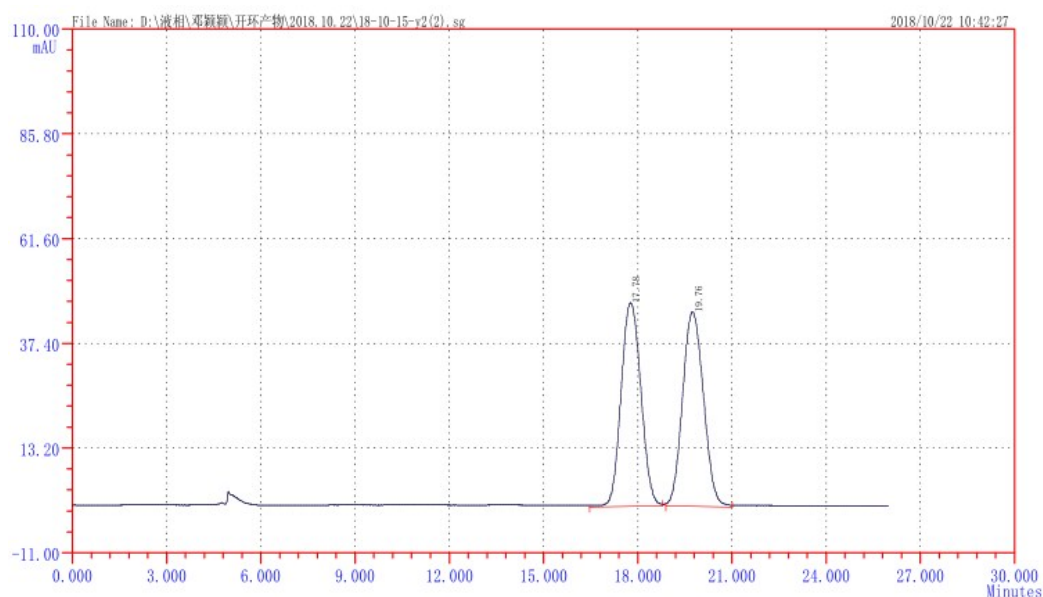

**Figure 1:** HPLC trace of racemic-**3aa** (2.5 mol% Ni(dppe)Cl<sub>2</sub>). HPLC analysis on chiral stationary phase (DAICEL CHIRACEL OD-H, heptane/i-PrOH = 99/1, flow: 1 mL/min,  $\lambda$  = 254), retention times were 17.8 min and 19.8 min.

| Peak No. | Time (min) | Area (mV*s) | Area (%) |
|----------|------------|-------------|----------|
| 1        | 17.779     | 207536.4    | 49.91    |
| 2        | 19.755     | 208319.7    | 50.09    |

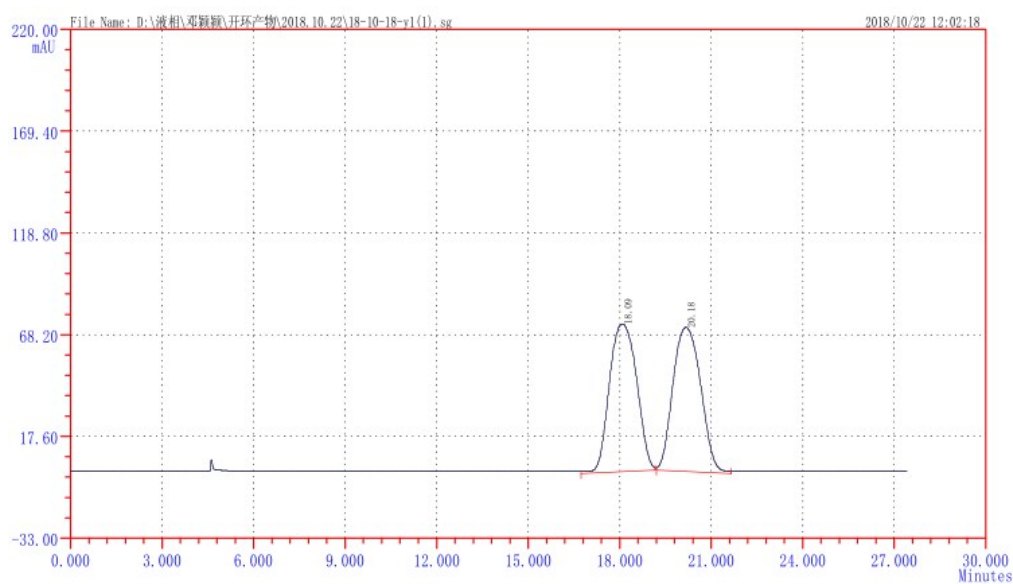

**Figure 2:** HPLC trace of enantioenriched-**3aa** (2.5 mol% Ni(dppe)Cl<sub>2</sub> and 2.5 mol% (*S*)-BINAP). The *ee* of 0% was determined by HPLC analysis on chiral stationary phase (DAICEL CHIRACEL OD-H, heptane/*i*-PrOH = 99/1, flow: 1 mL/min,  $\lambda$  = 254), retention times were 18.1 min and 20.2 min.

| Peak No. | Time (min) | Area (mV*s) | Area (%) |
|----------|------------|-------------|----------|
| 1        | 18.092     | 455758.3    | 50.06    |
| 2        | 20.178     | 454502.6    | 49.93    |

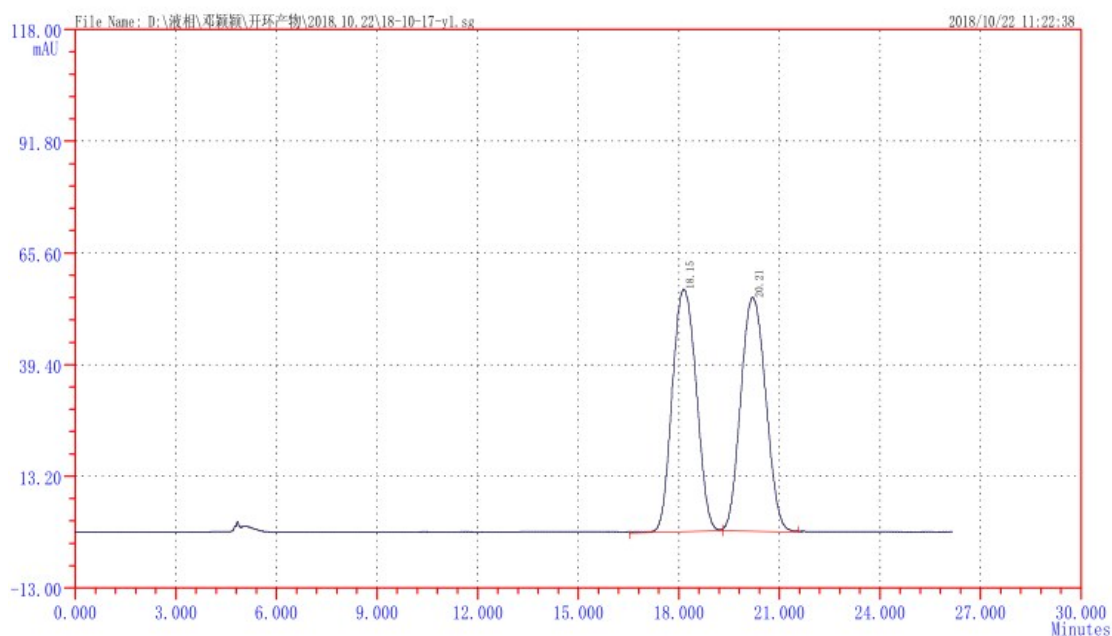

**Figure 3:** HPLC trace of enantioenriched-**3aa** (2.5 mol% Ni(dppe)Cl<sub>2</sub> and 2.5 mol% **L1**). The *ee* of 0% was determined by HPLC analysis on chiral stationary phase (DAICEL CHIRACEL OD-H, heptane/*i*-PrOH 99/1, flow: 1 mL/min,  $\lambda$  = 254), retention times were 18.2 min and 20.2 min.

| Peak No. | Time (min) | Area (mV*s) | Area (%) |
|----------|------------|-------------|----------|
| 1        | 18.152     | 284021.0    | 49.93    |
| 2        | 20.210     | 284821.2    | 50.07    |

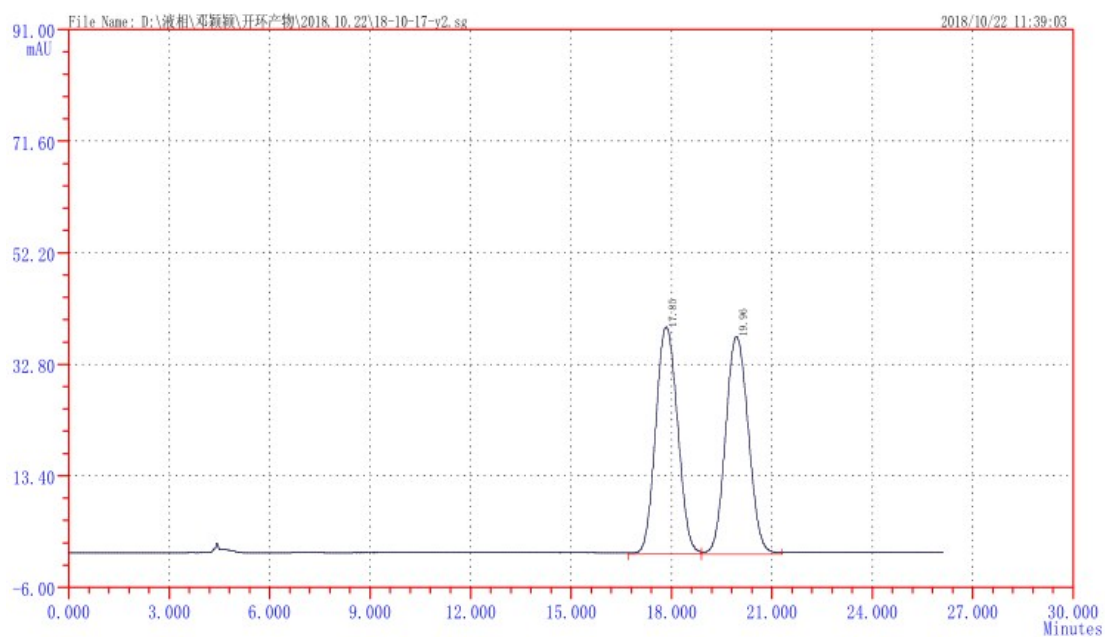

**Figure 4:** HPLC trace of enantioenriched-**3aa** (2.5 mol% Ni(dppe)Cl<sub>2</sub> and 2.5 mol% **L2**). The *ee* of 0% was determined by HPLC ananlysis on chiral stationary phase (DAICEL CHIRACEL OD-H, heptane/*i*-PrOH = 99/1, flow: 1 mL/min,  $\lambda$  = 254), retention times were 17.9 min and 20.0 min.

| Peak No. | Time (min) | Area (mV*s) | Area (%) |
|----------|------------|-------------|----------|
| 1        | 17.854     | 180615.2    | 49.89    |
| 2        | 19.956     | 181379.0    | 50.10    |

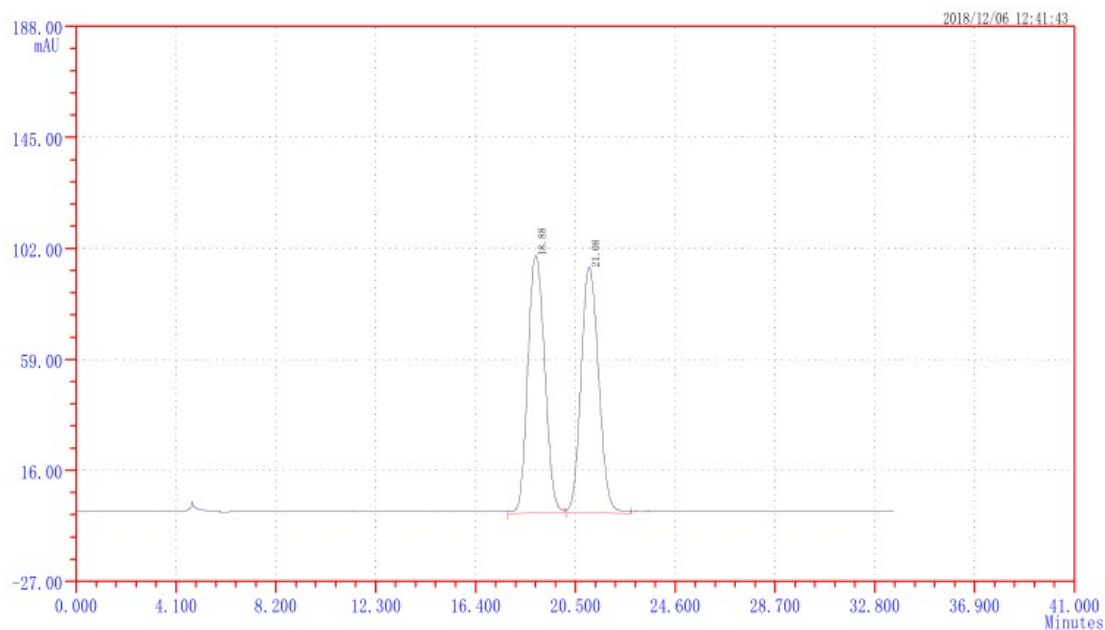

**Figure 5:** HPLC trace of racemic-**3aa** (2.5 mol% Ni(COD)<sub>2</sub> and 2.5 mol% dppe). HPLC analysis on chiral stationary phase (DAICEL CHIRACEL OD-H, heptane/*i*-PrOH = 99/1, flow: 1 mL/min,  $\lambda$  = 254), retention times were 18.9 min and 21.0 min.

| Peak No. | Time (min) | Area (mV*s) | Area (%) |
|----------|------------|-------------|----------|
| 1        | 18.883     | 478674.6    | 49.90    |
| 2        | 21.080     | 480478.2    | 50.10    |

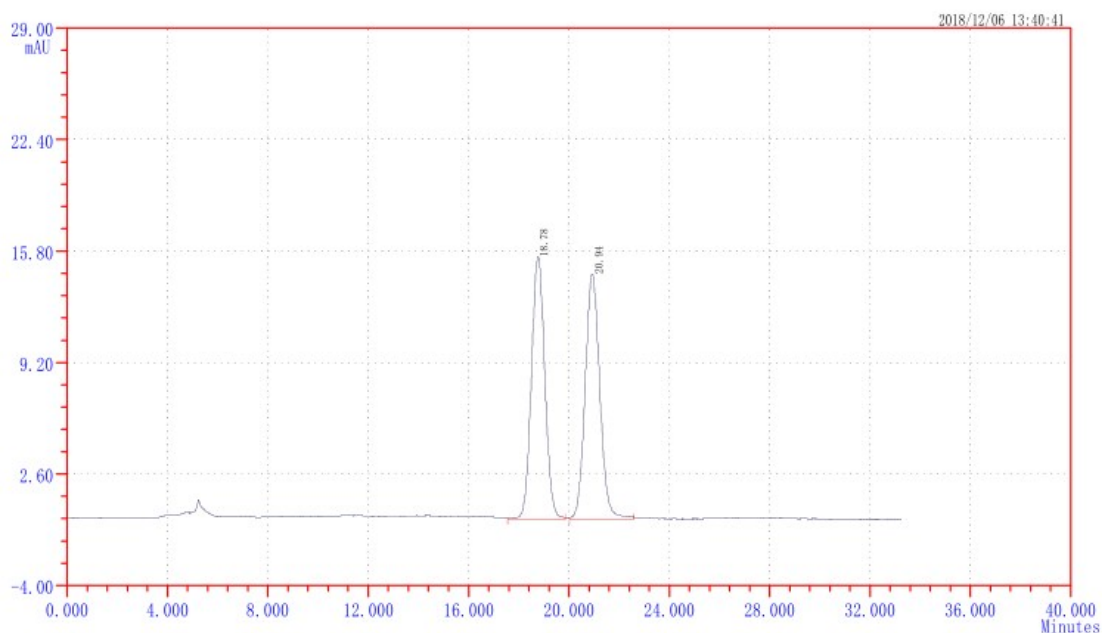

**Figure 6:** HPLC trace of trace of enantioenriched-**3aa** (2.5 mol% Ni(COD)<sub>2</sub> and 2.5 mol% **L1**).. The *ee* of 1% was determined by HPLC analysis on chiral stationary phase (DAICEL CHIRACEL OD-H, heptane/*i*-PrOH = 99/1, flow: 1 mL/min,  $\lambda$  = 254), retention times were 18.8 min and 20.9 min.

| Peak No. | Time (min) | Area (mV*s) | Area (%) |
|----------|------------|-------------|----------|
| 1        | 18.777     | 57823.9     | 49.45    |
| 2        | 20.942     | 59104.4     | 48.45    |

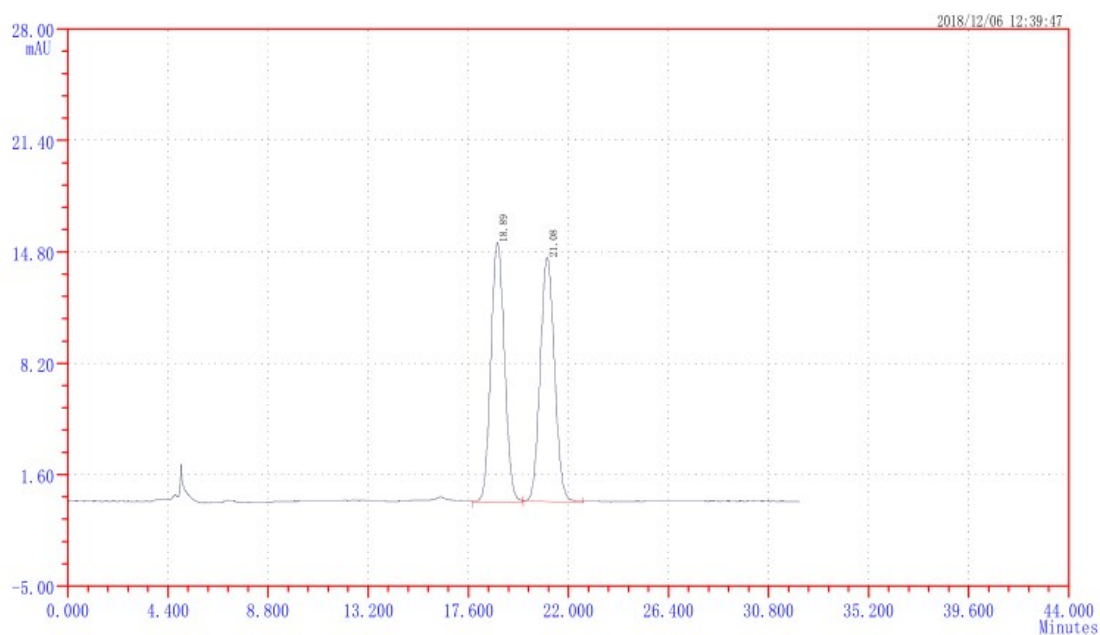

**Figure 7:** HPLC trace of trace of enantioenriched-**3aa** (2.5 mol% Ni(COD)<sub>2</sub> and 2.5 mol% **L2**). The *ee* of 1% was determined by HPLC analysis on chiral stationary phase (DAICEL CHIRACEL OD-H, heptane/*i*-PrOH = 99/1, flow: 1 mL/min,  $\lambda$  = 254), retention times were 18.9 min and 21.1 min.

| Peak No. | Time (min) | Area (mV*s) | Area (%) |
|----------|------------|-------------|----------|
| 1        | 18.892     | 63730.9     | 49.95    |
| 2        | 21.077     | 63856.0     | 48.95    |
